# Supplementary material for: Daily Rhythmicity of Clock Gene Transcripts in Atlantic Cod Fast Skeletal Muscle
Source: PubMed Central journal article supplement (PMC4062345; doi:10.1371/journal.pone.0099172), 2014-06-12

# Figure S2

## A. *arntl1*

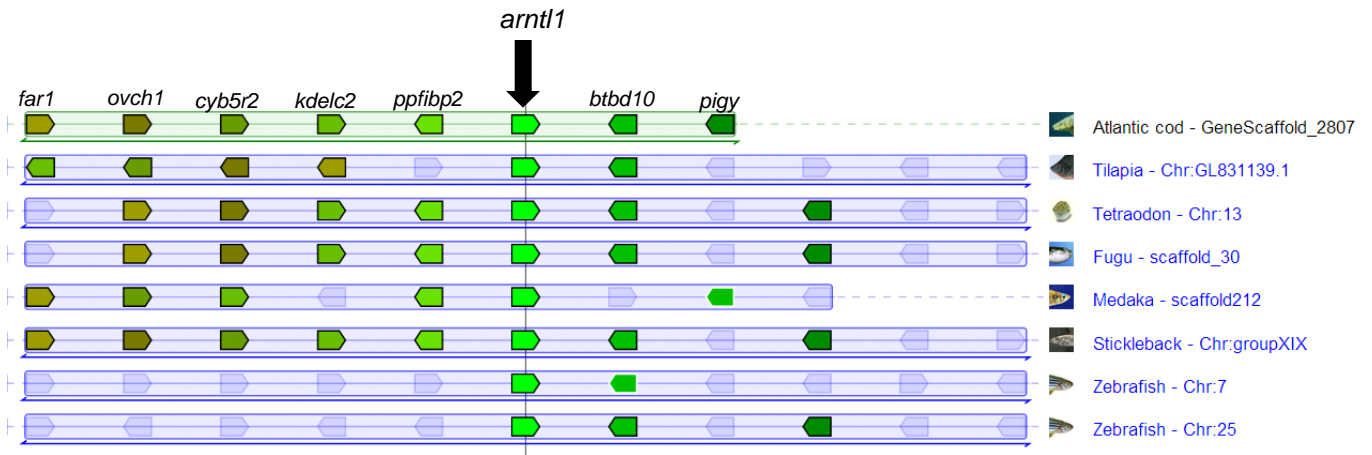

## B. *arntl2*

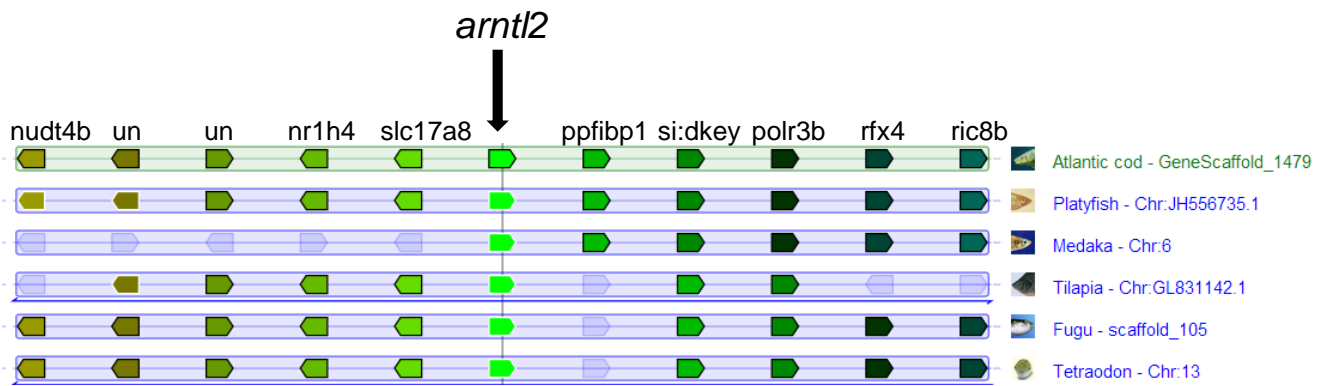

## C. *clock*

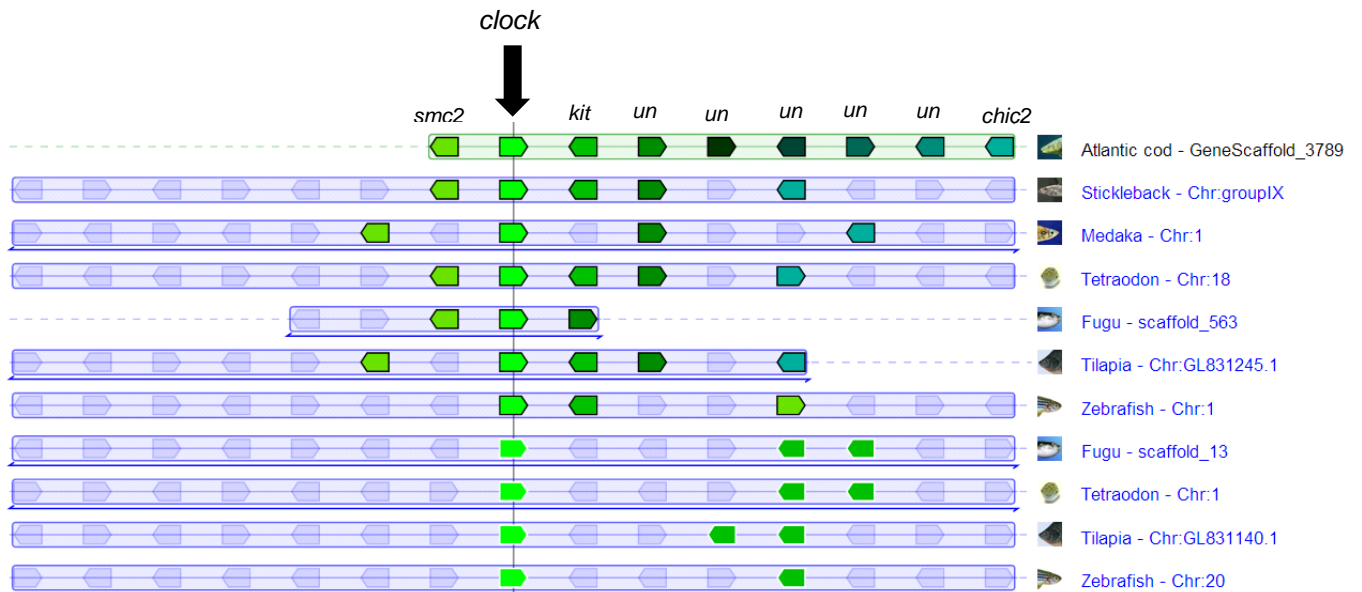

# Figure S2

## D. npas1

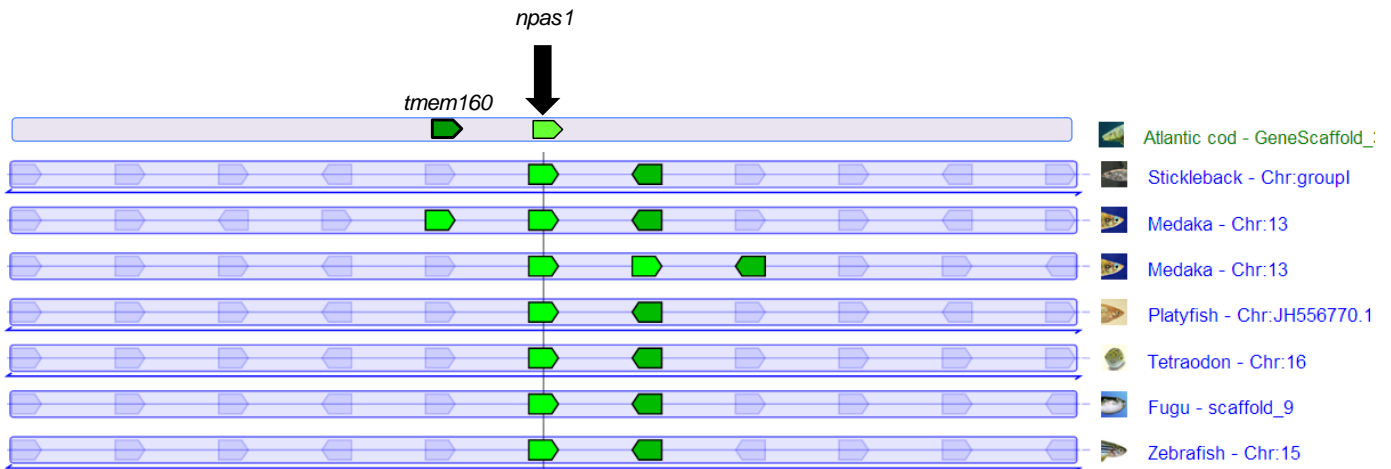

## E. npas2

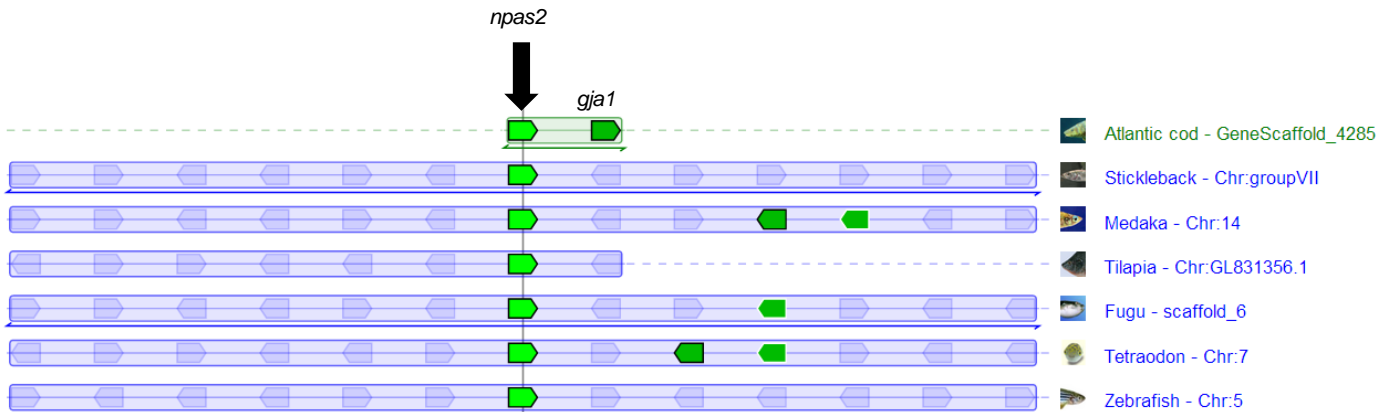

## F. cry1

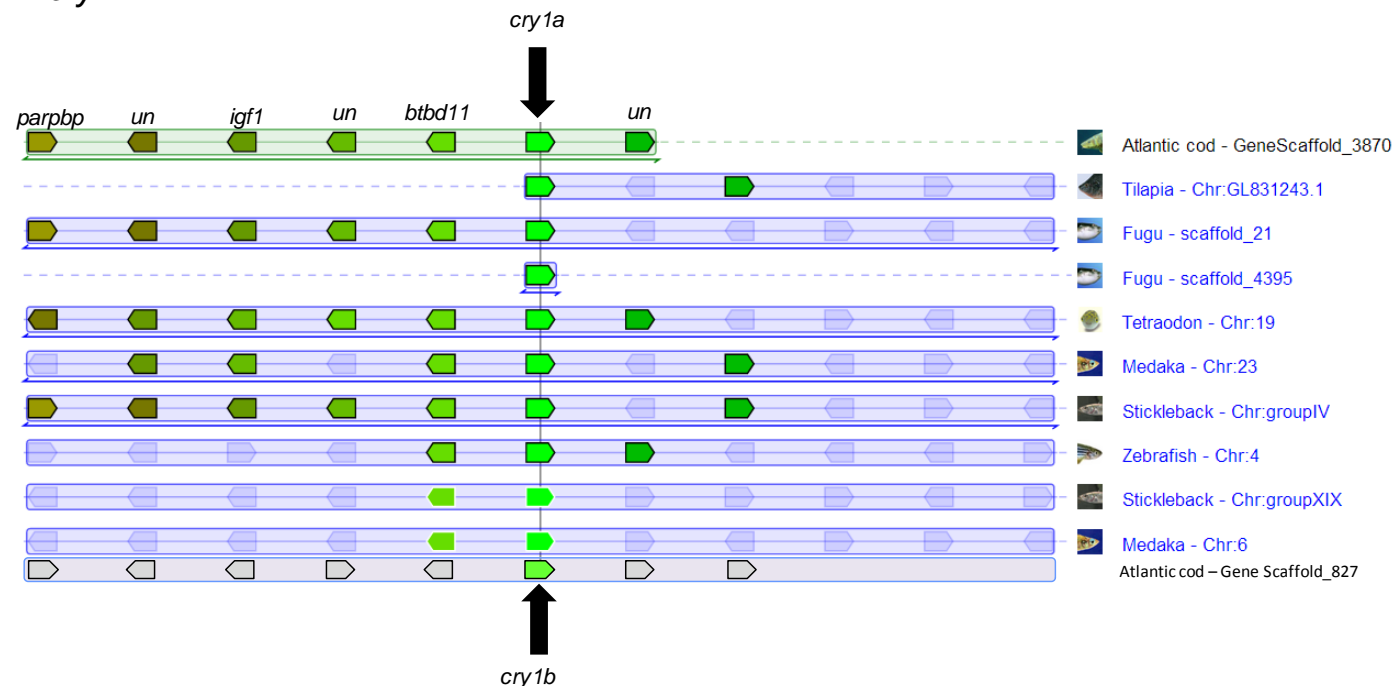

# Figure S2

## *G. cry-dash*

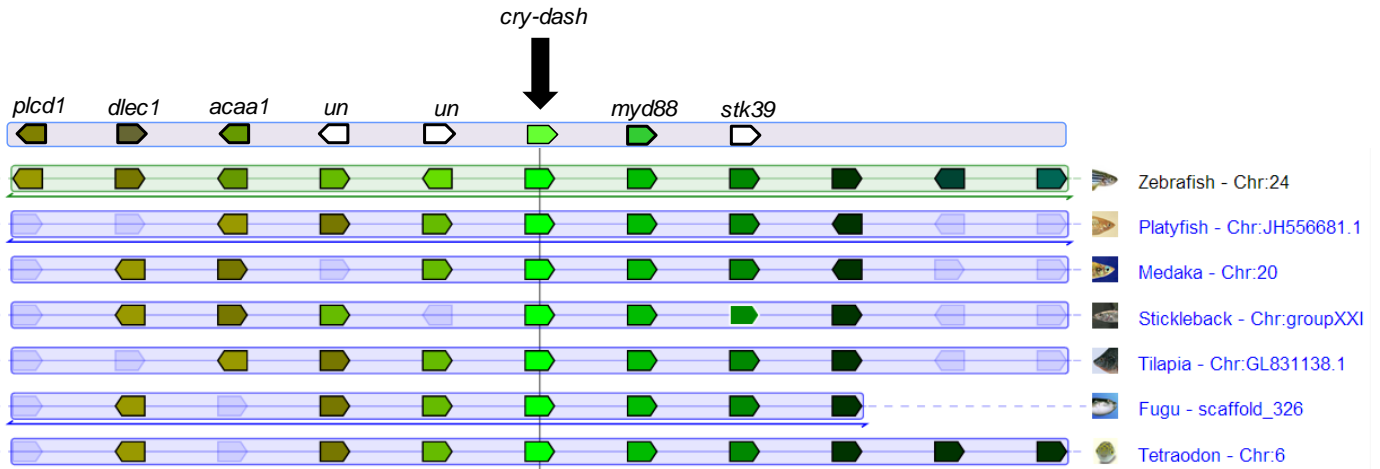

## *H. cry2*

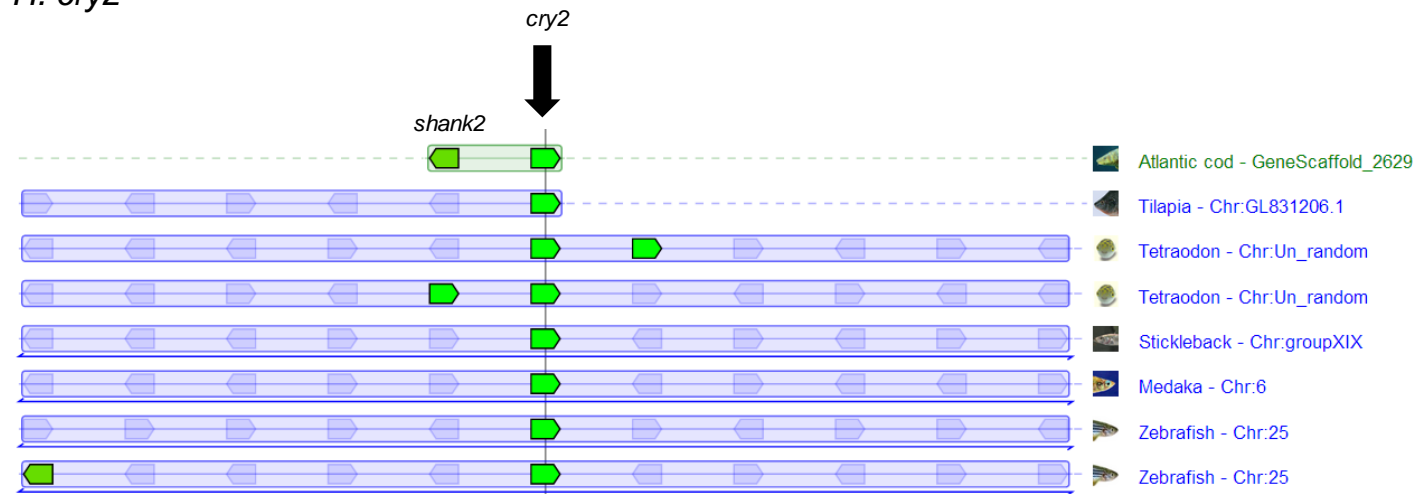

## *I. cry3*

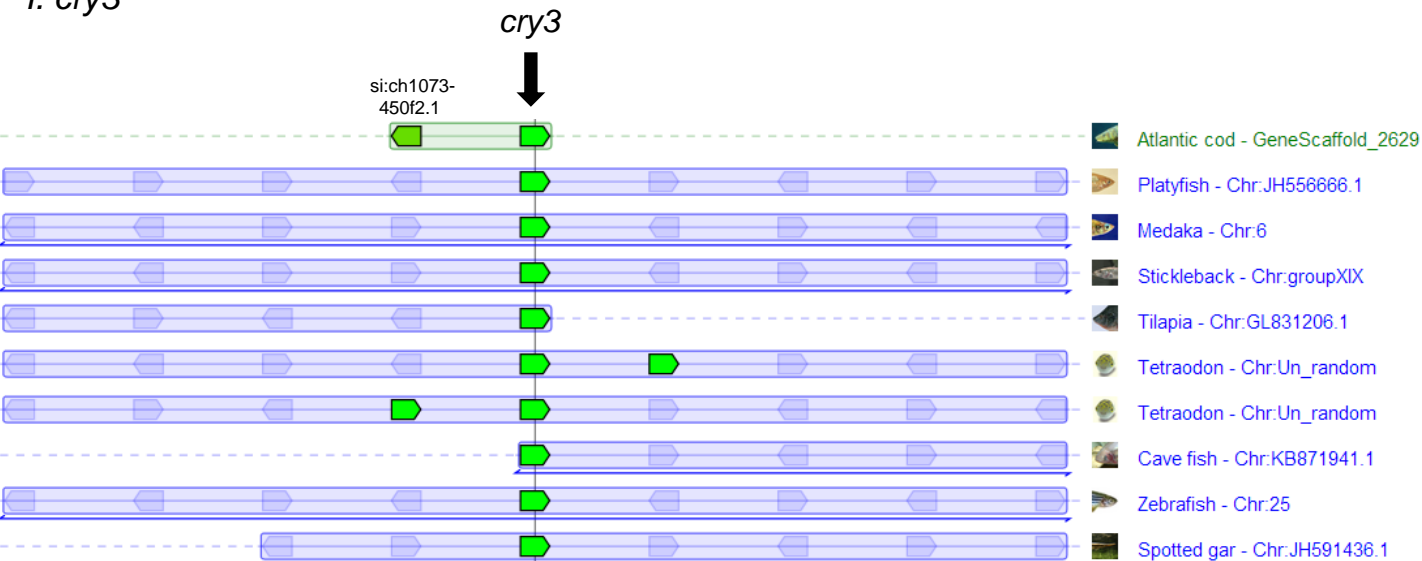

Figure S2

*J. per1*

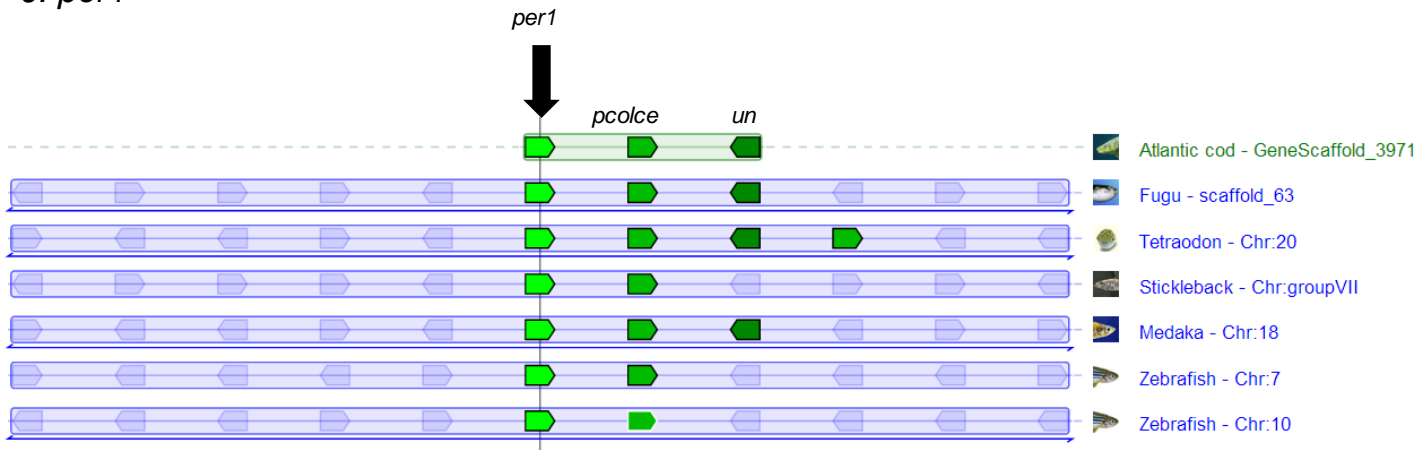

*K. per2*

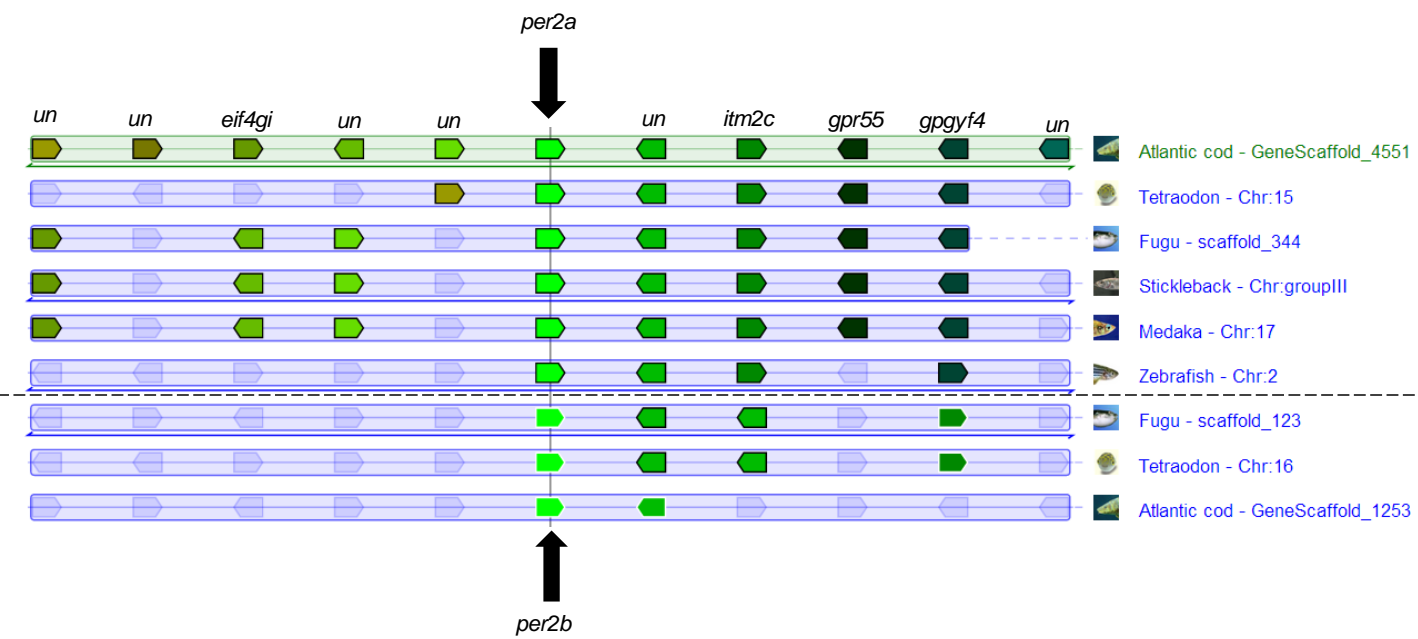

*L. tim*

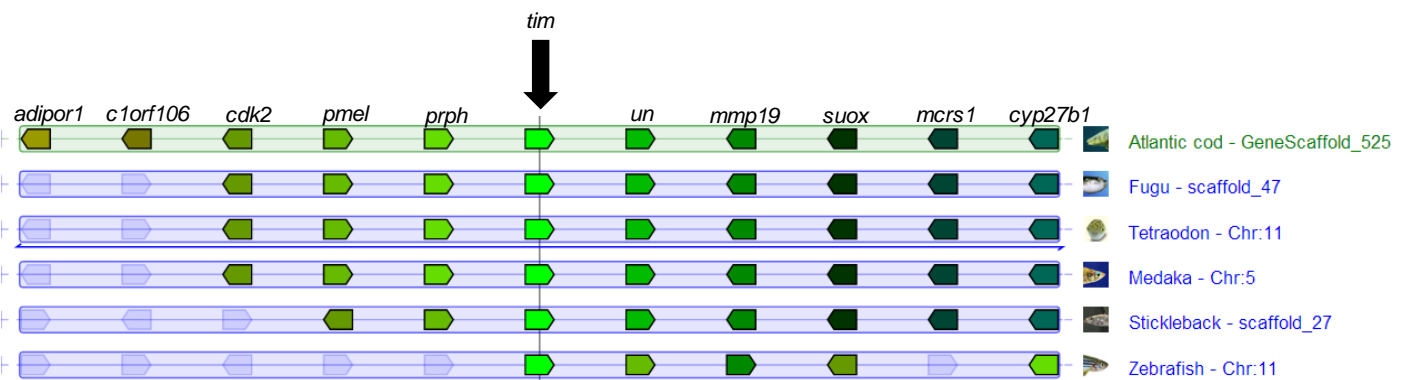

Figure S2

*M. nr1d1*

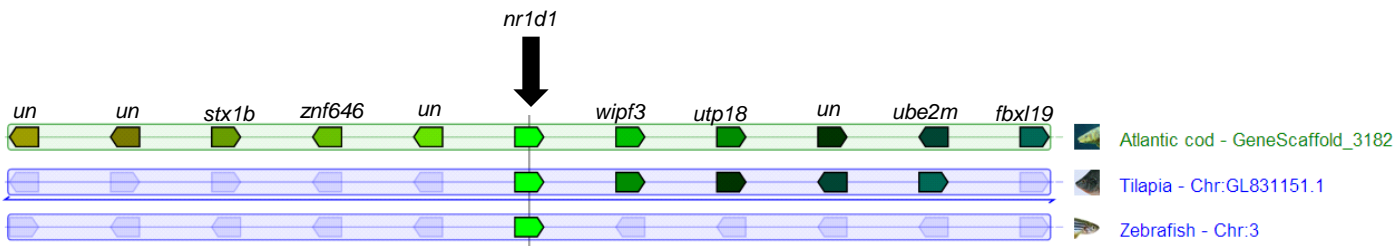

*N. nr1d2*

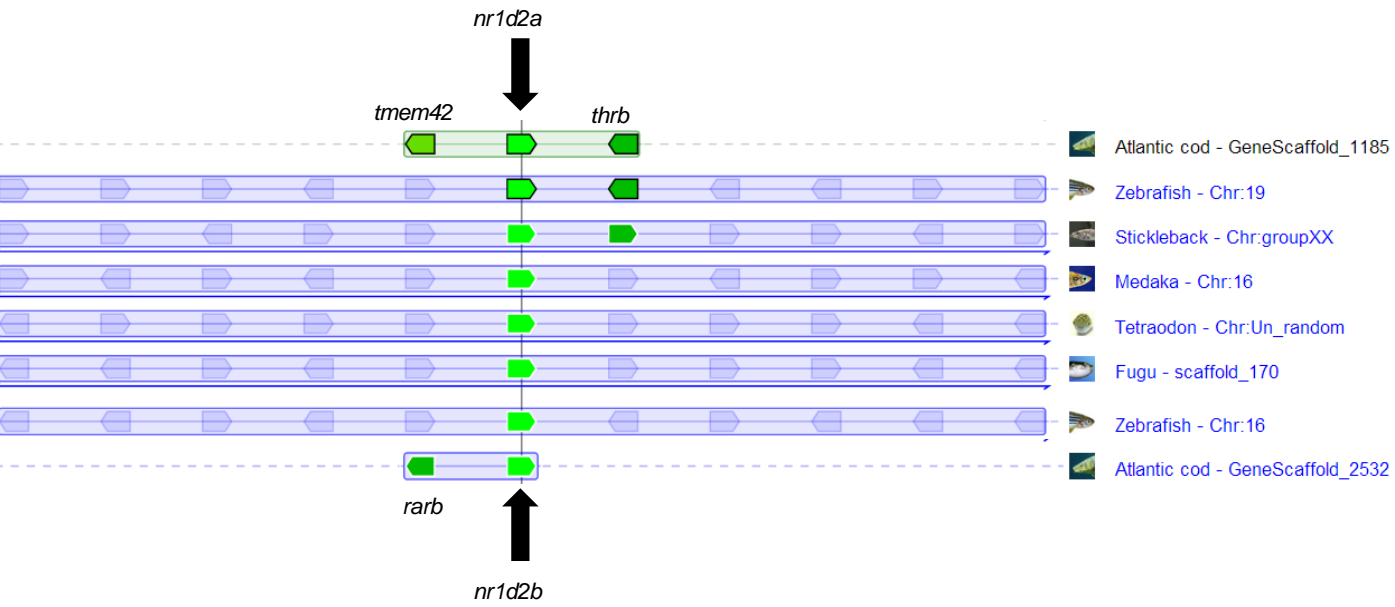

*O. rora*

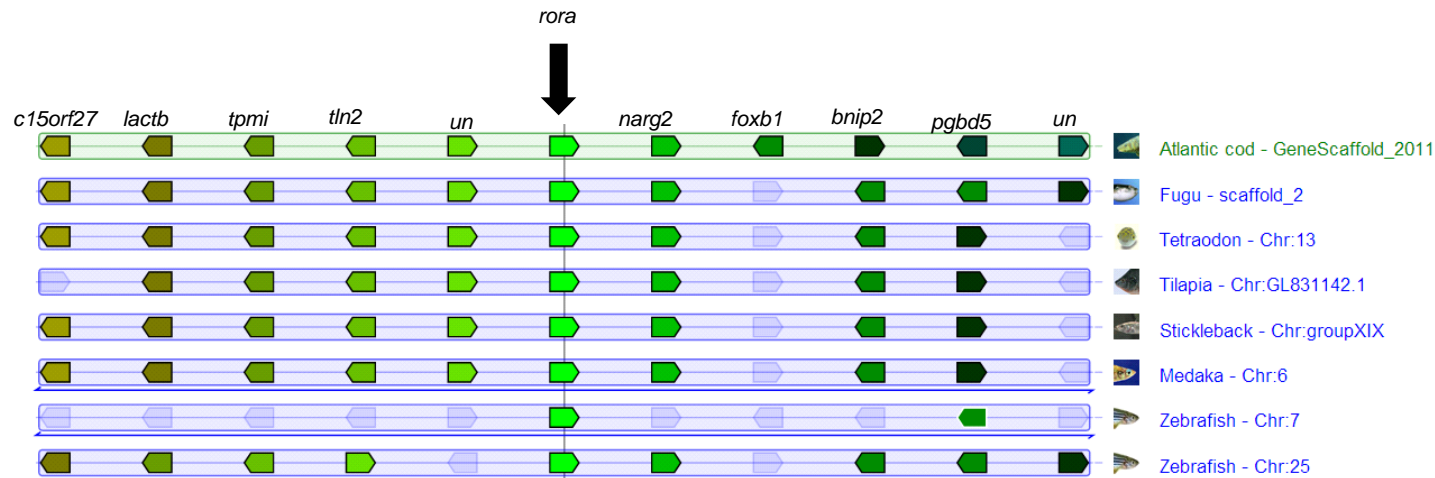

Supplement: pone.0099172.s002.pdf [file pone.0099172.s002.pdf]
