# Supplementary material for: Daily Rhythmicity of Clock Gene Transcripts in Atlantic Cod Fast Skeletal Muscle
Source: PubMed Central journal article supplement (PMC4062345; doi:10.1371/journal.pone.0099172), 2014-06-12

Figure S1

A. Arntl

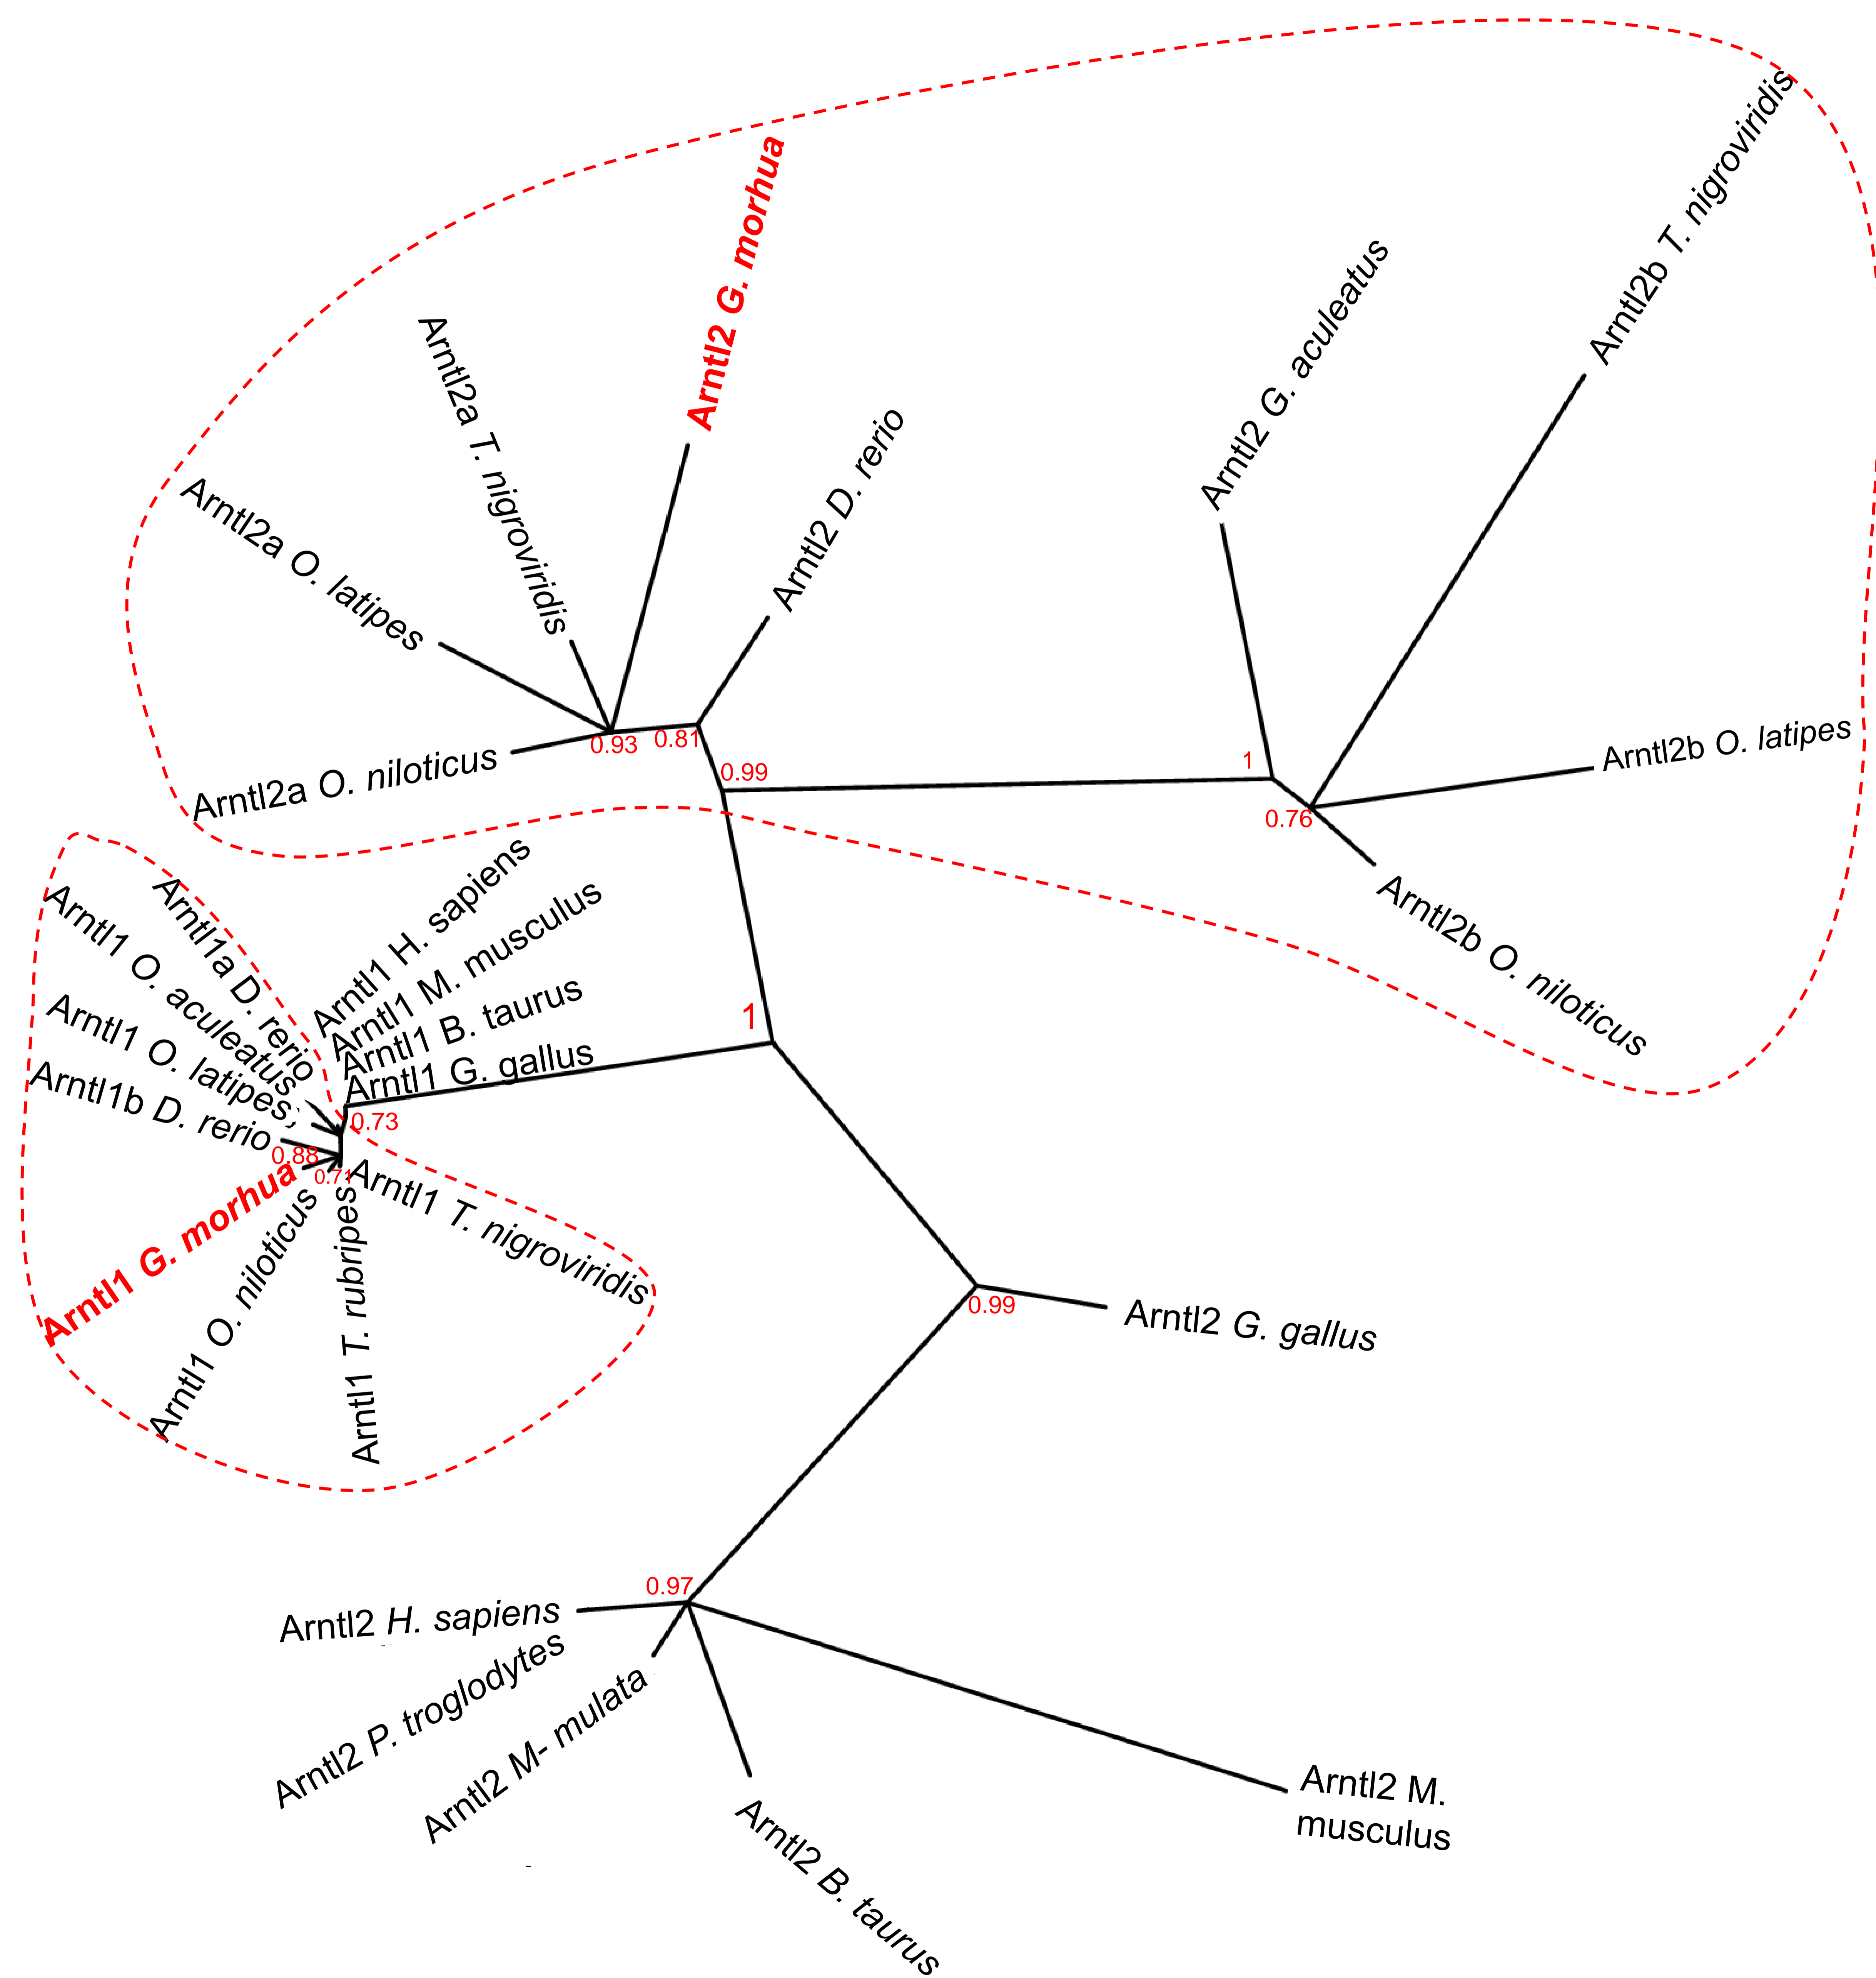

**Figure S1**

**B. Clock**

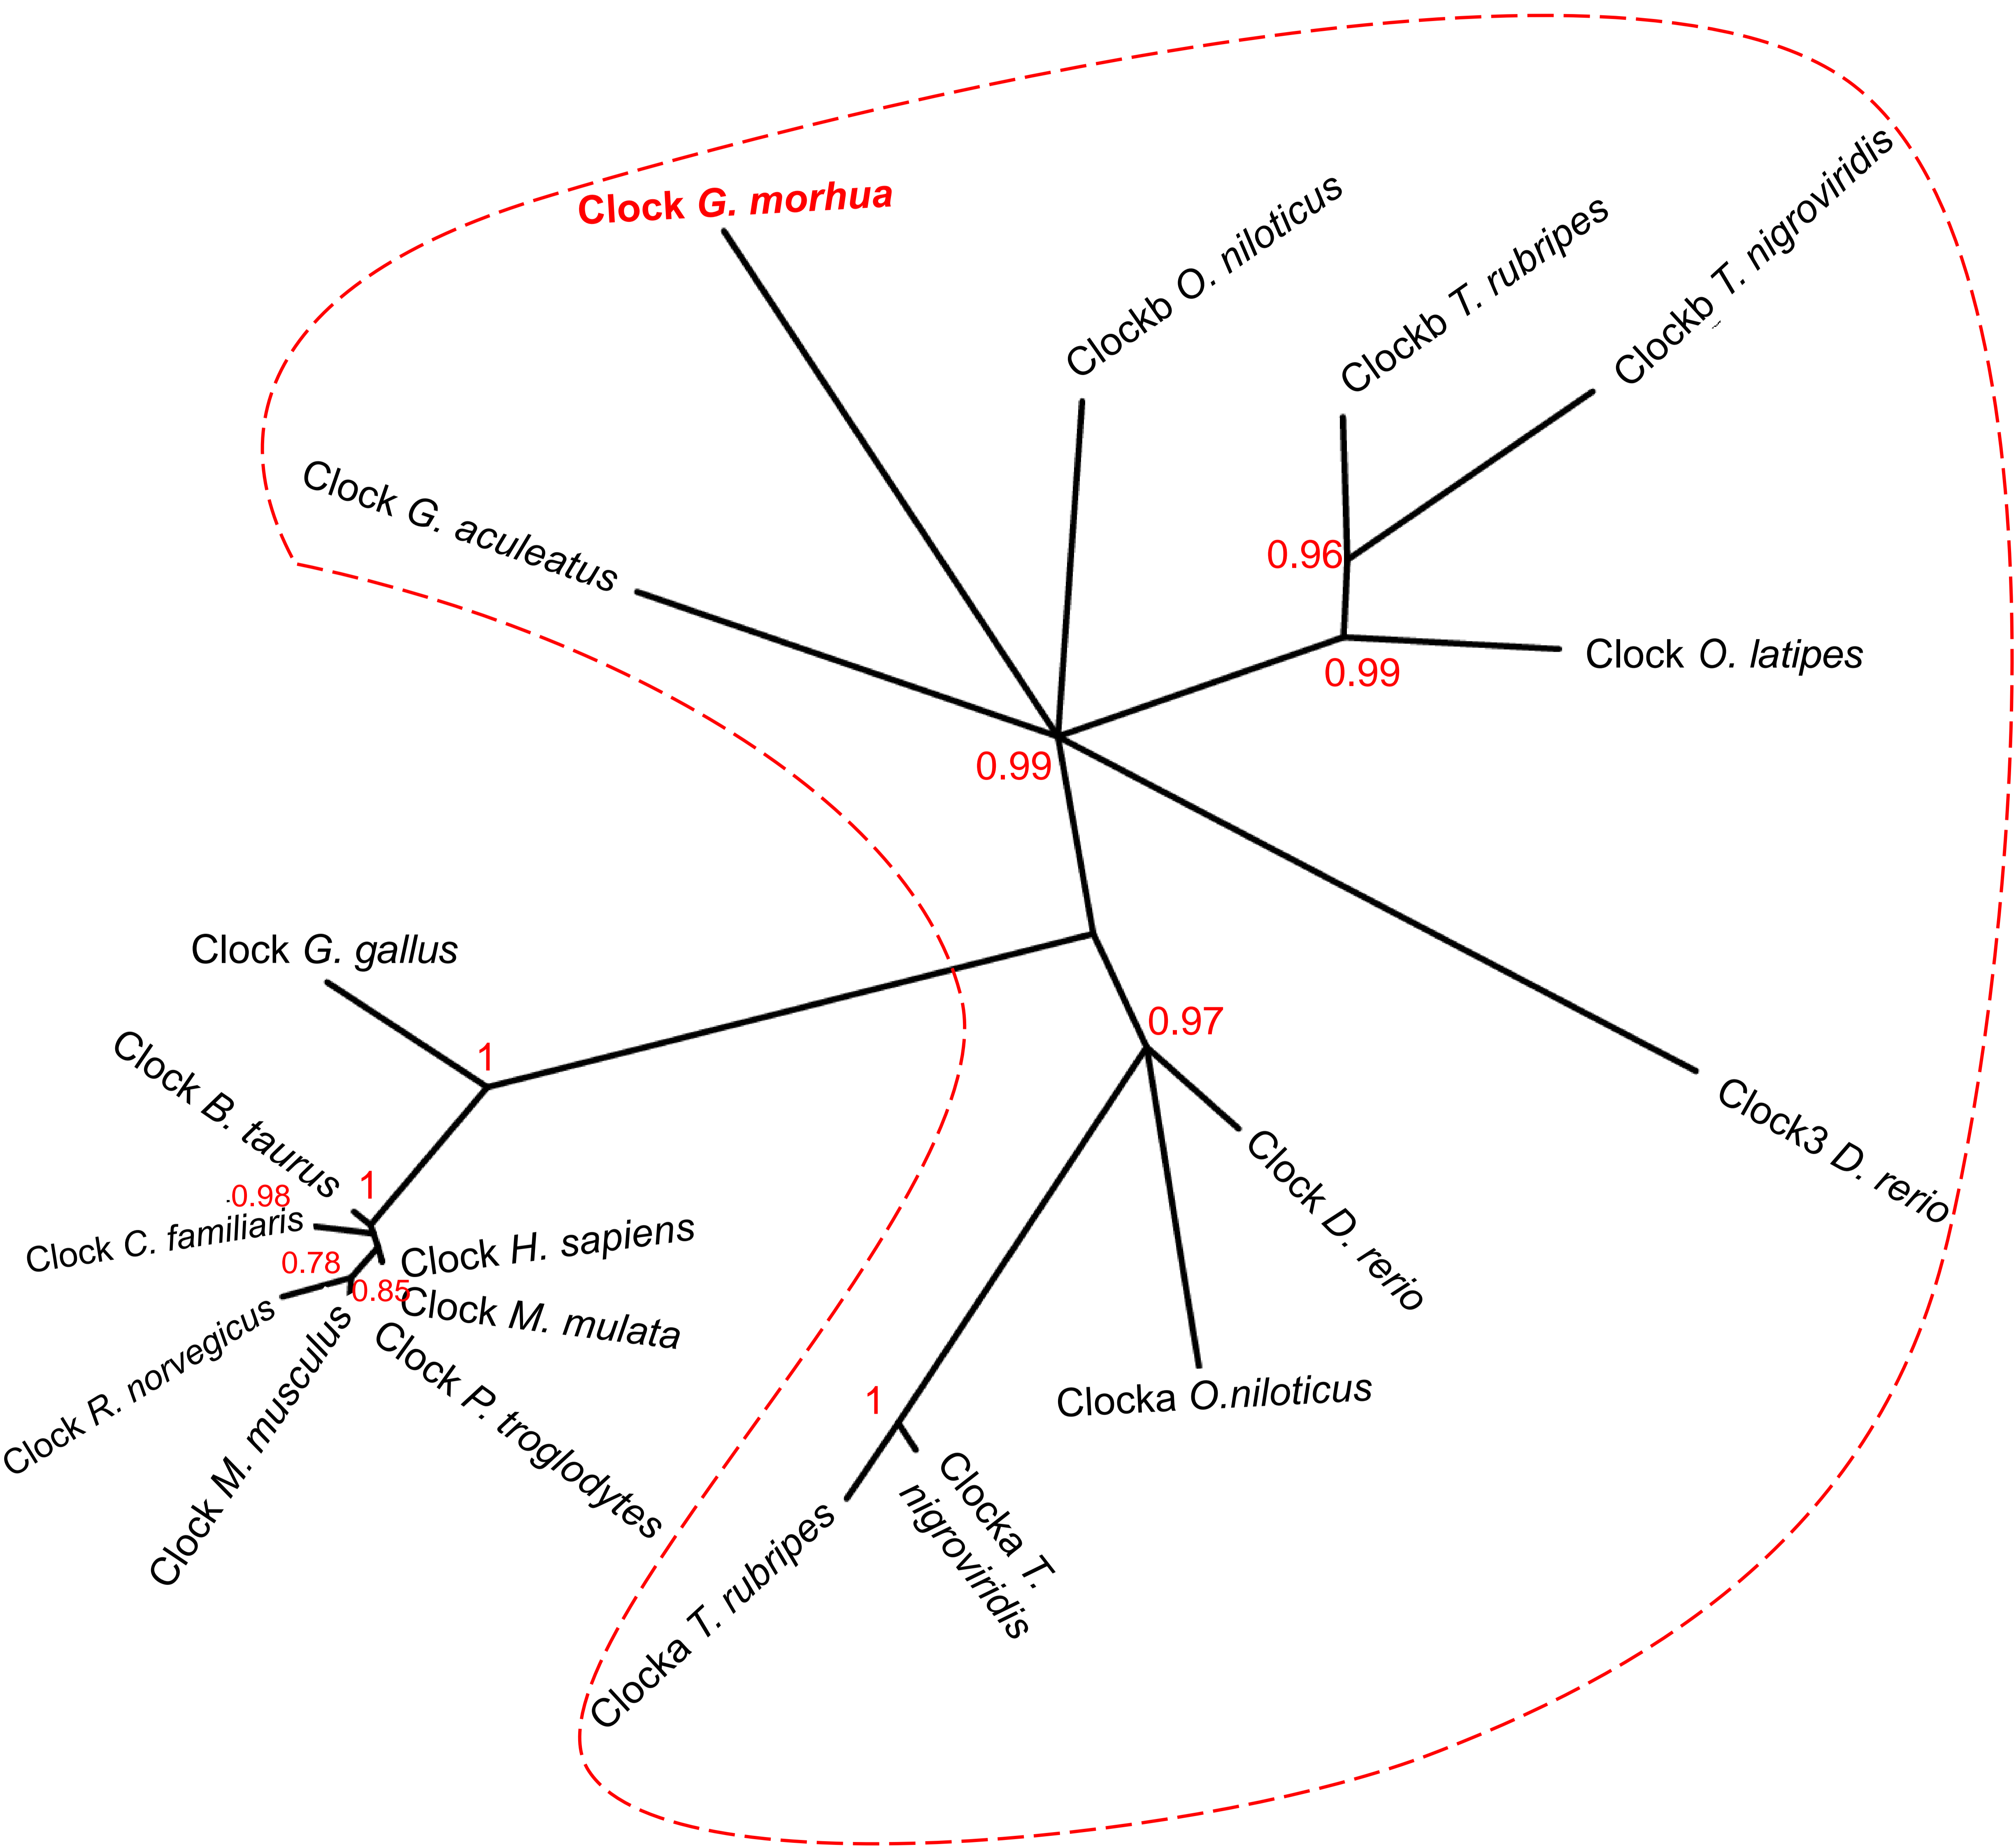

Figure S1

C. Npas

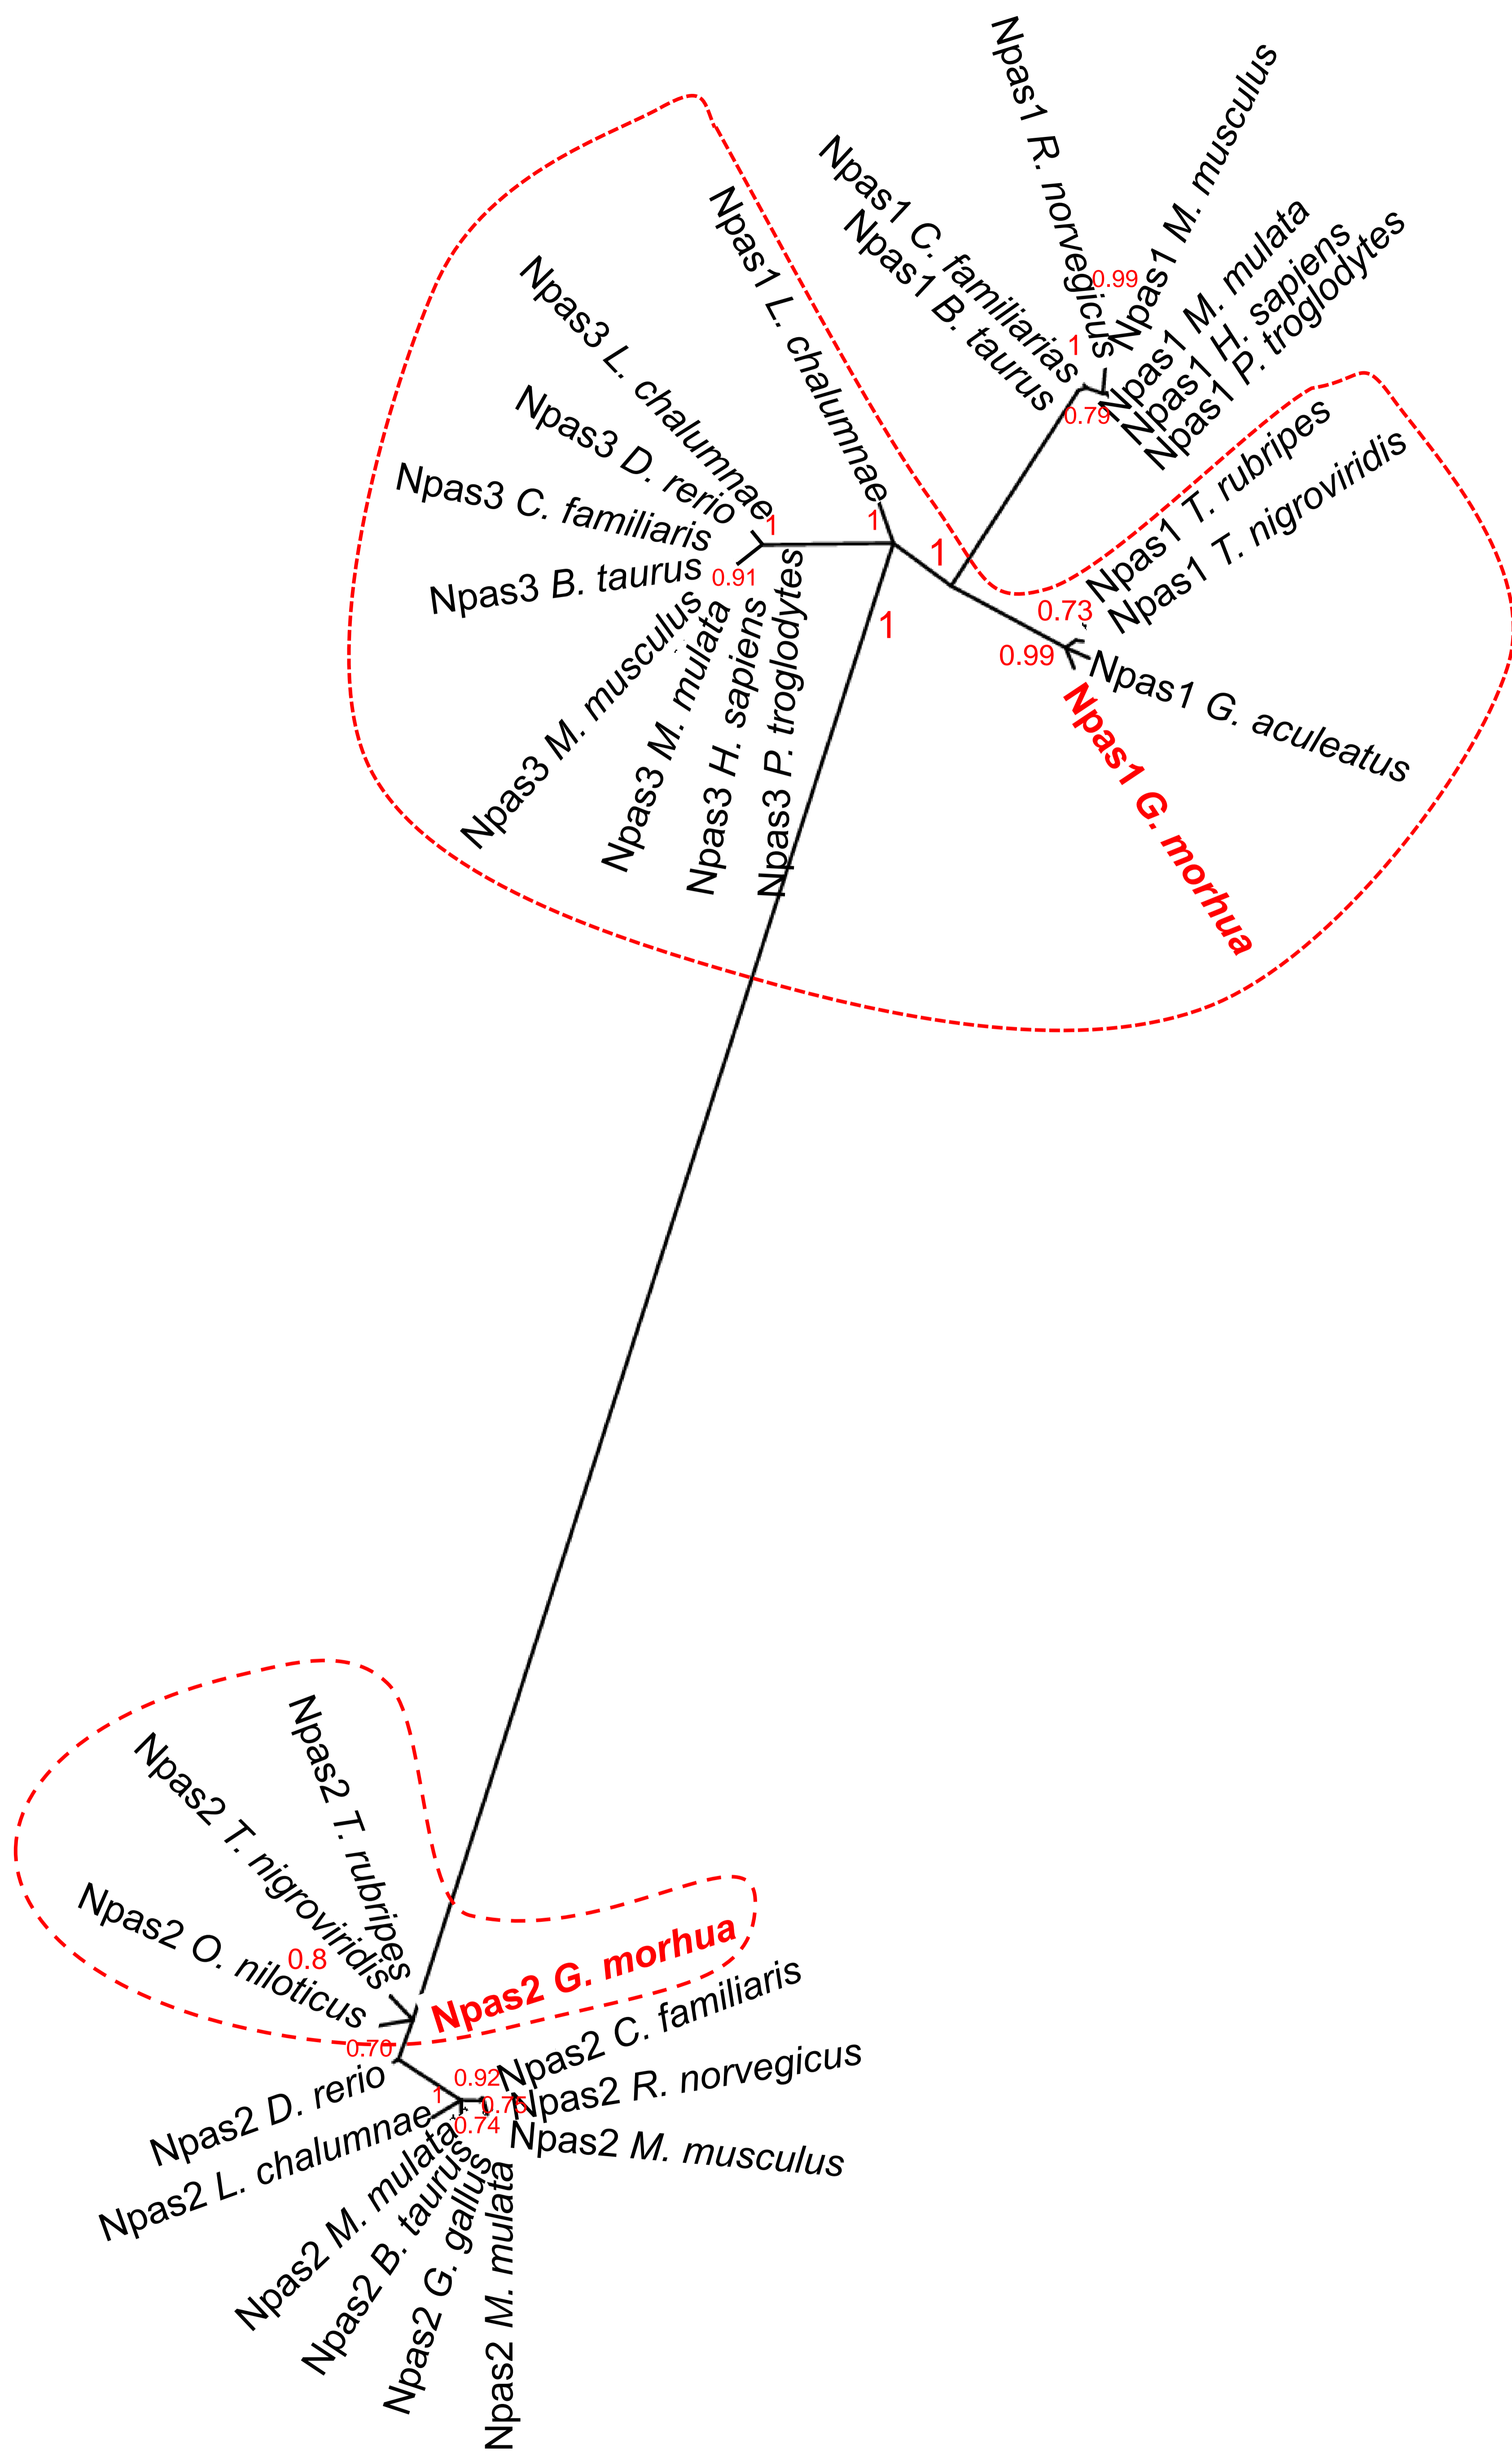

Figure S1

D. Cry

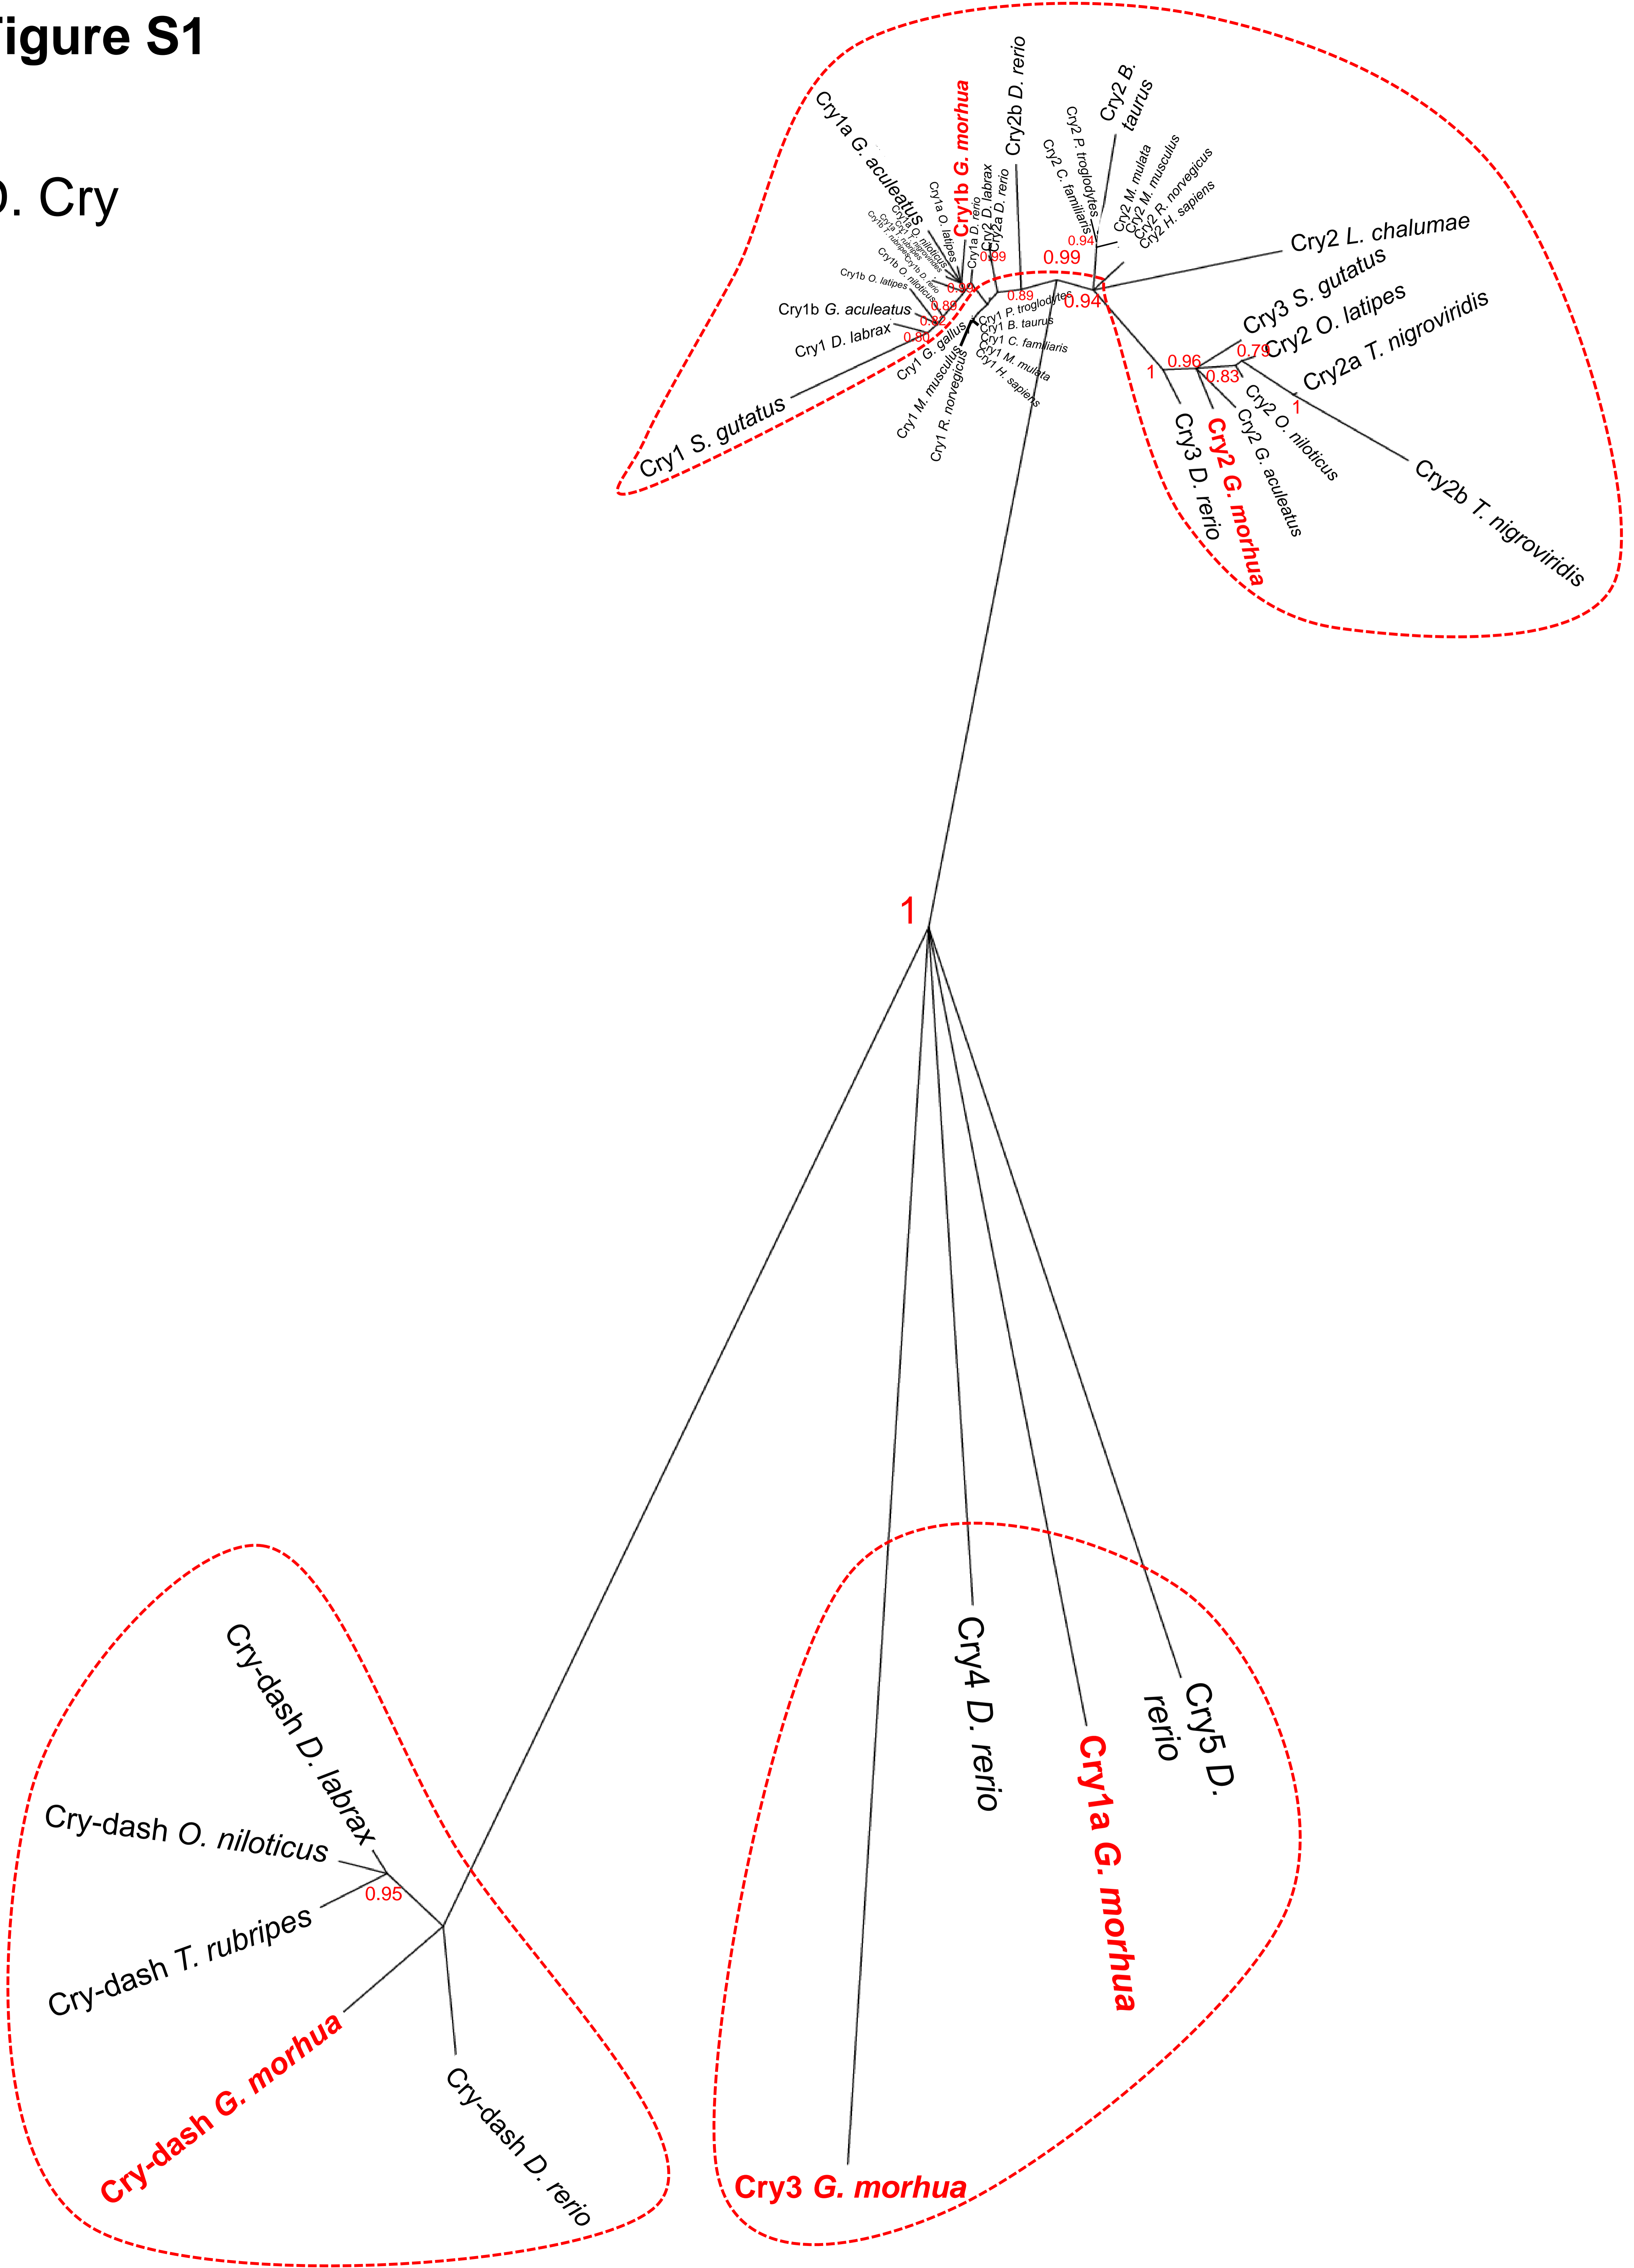

# Figure S1

## E. Per

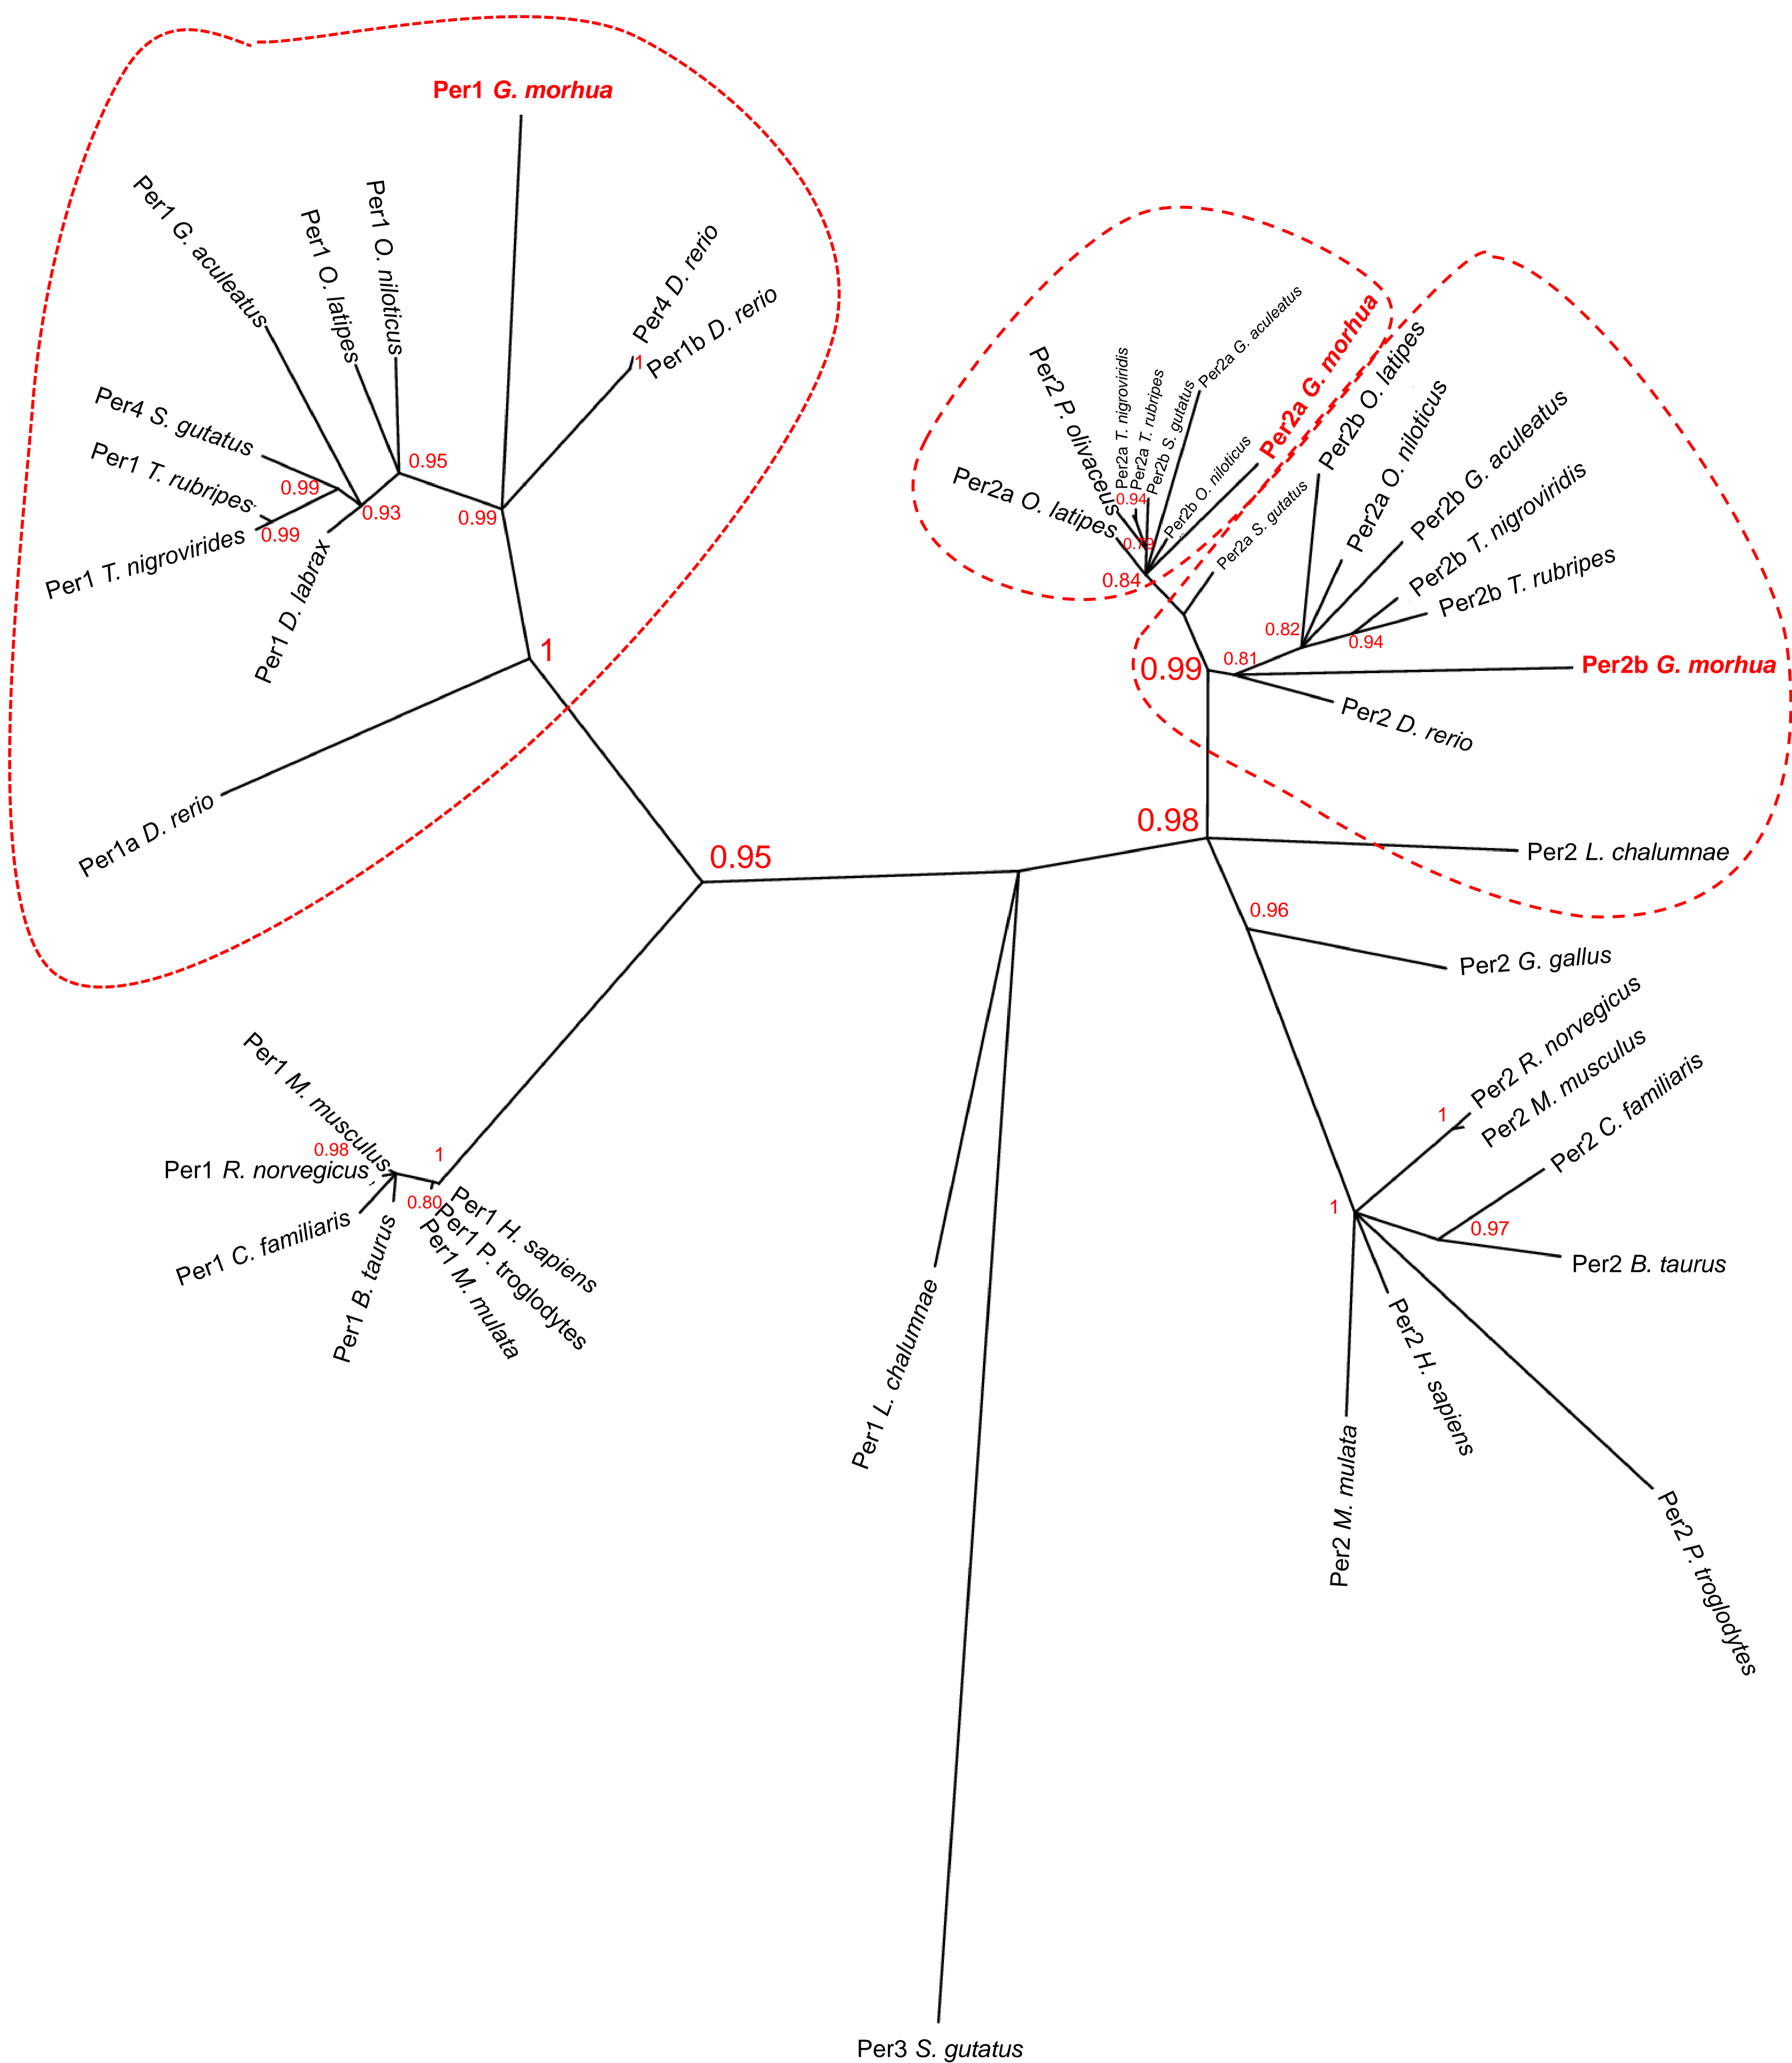

Figure S1

F. Tim

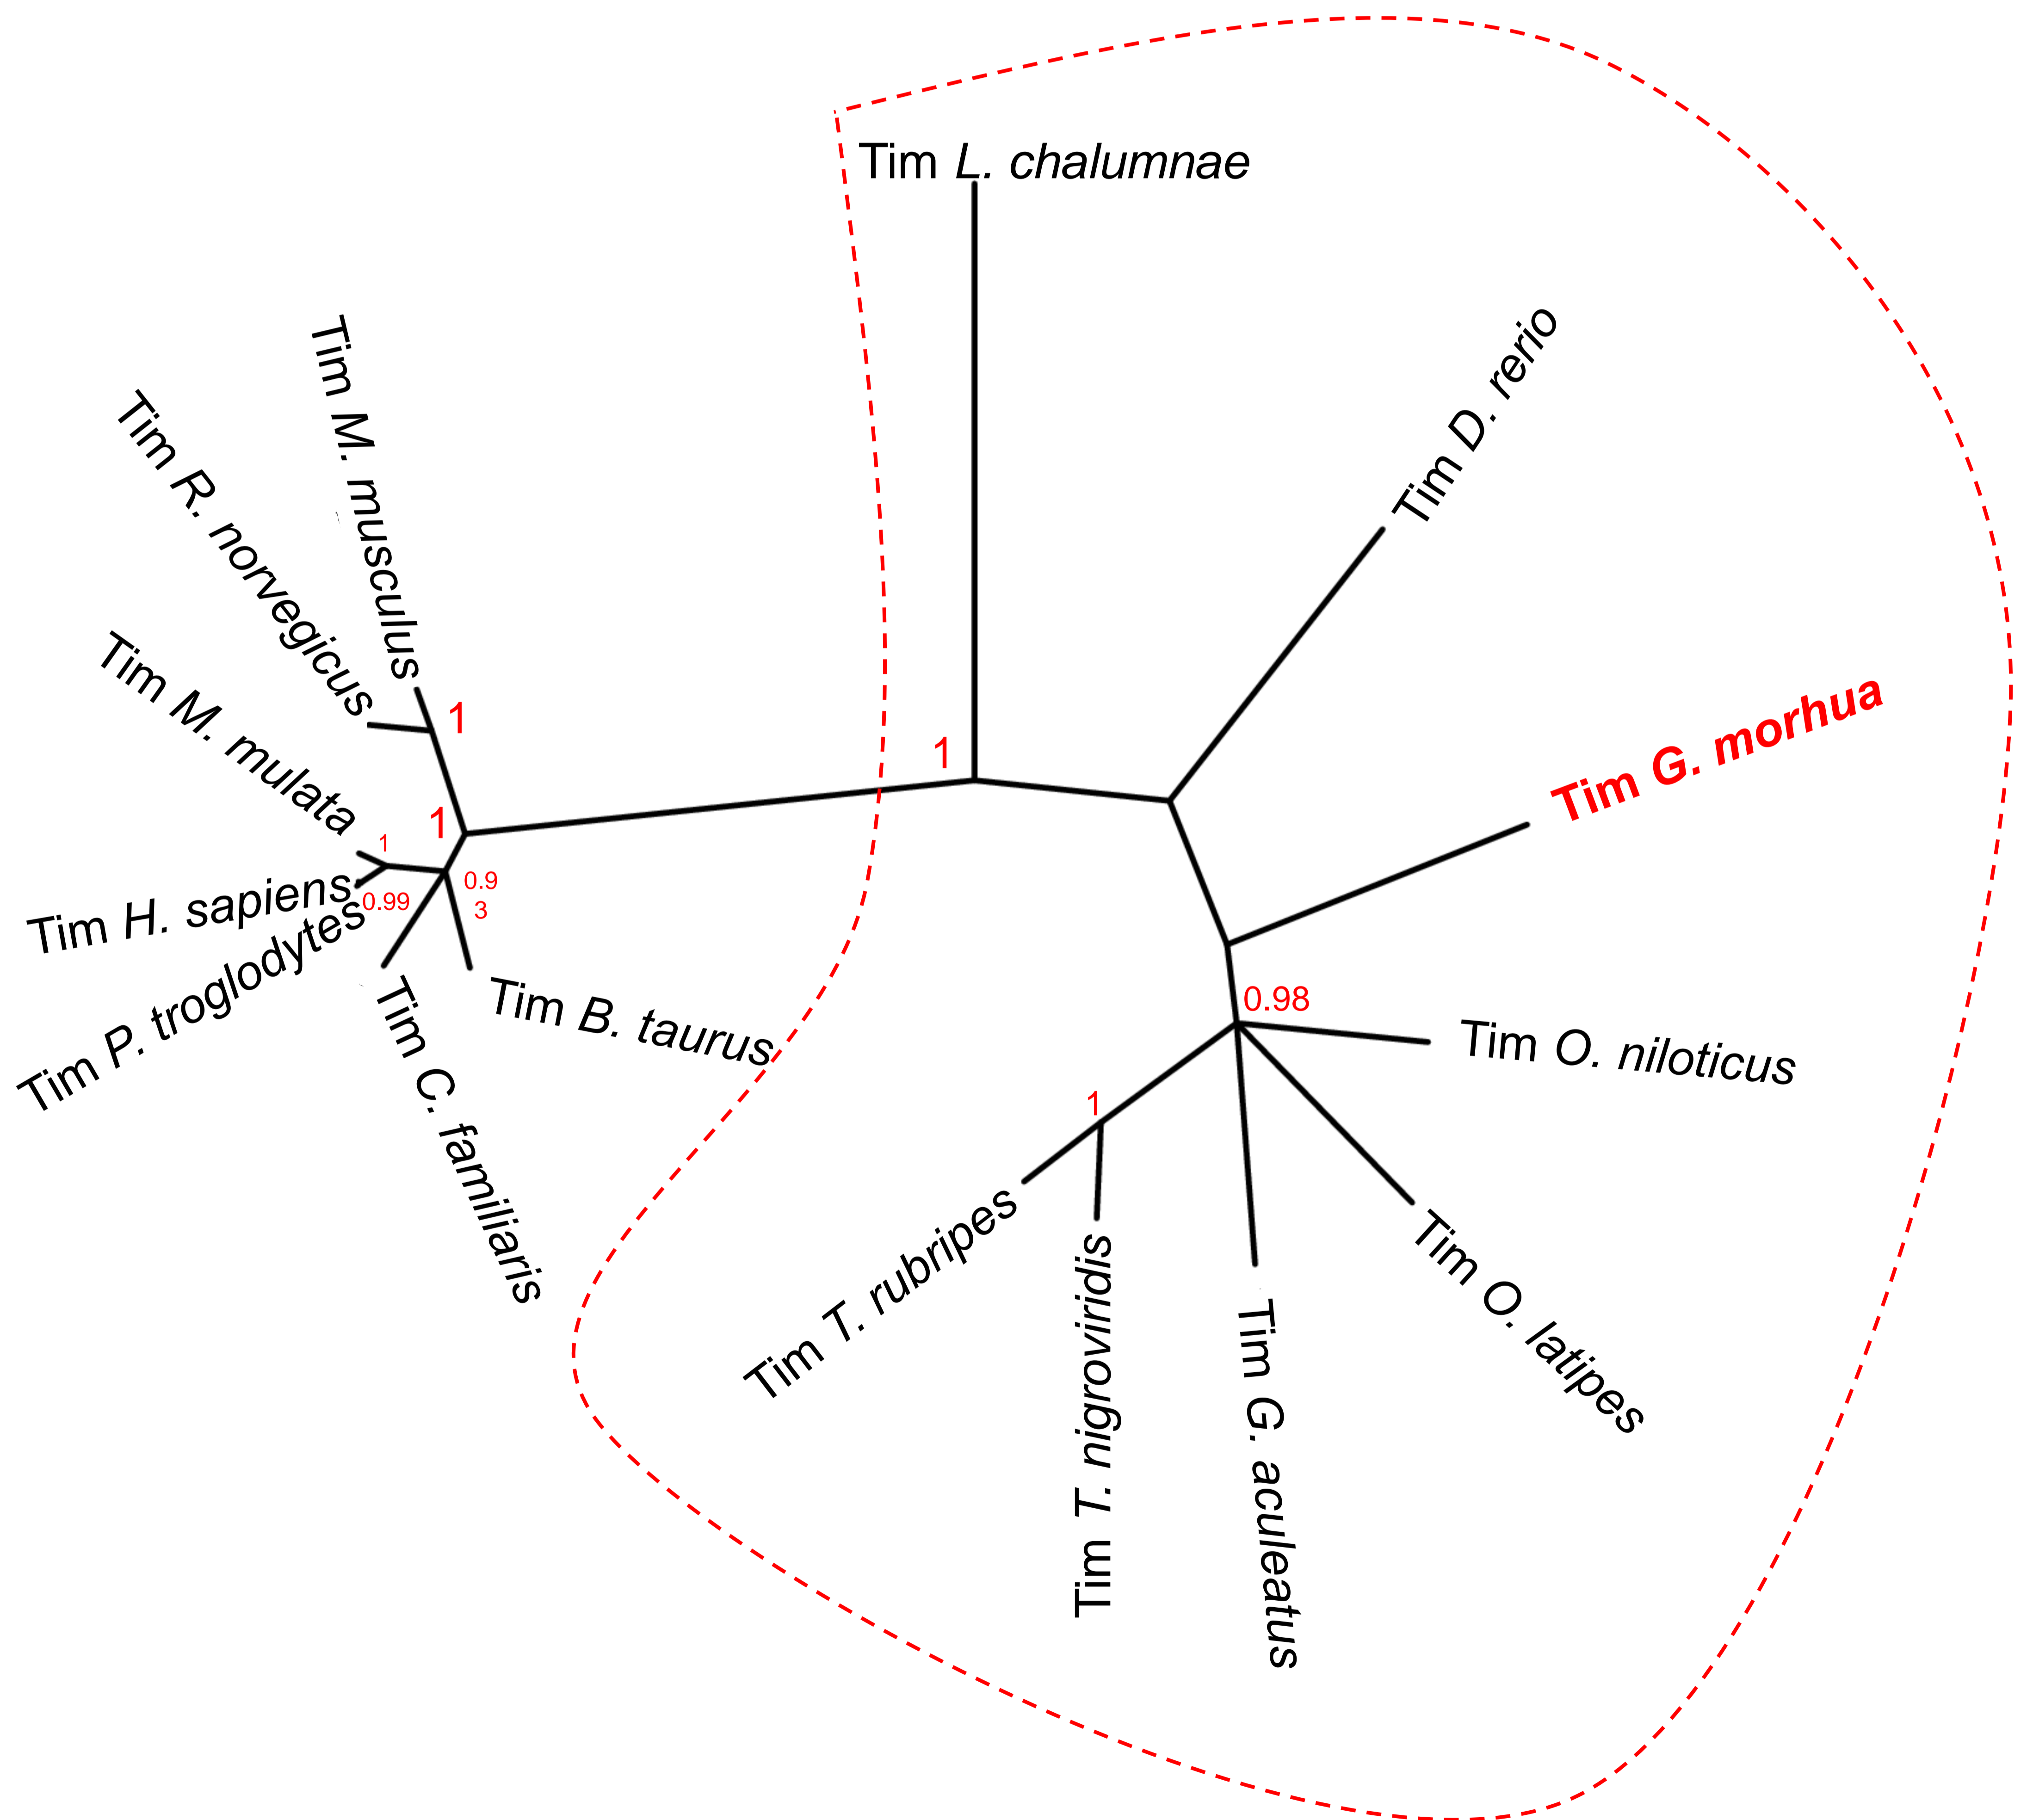

# Figure S1

## G. Nr1d

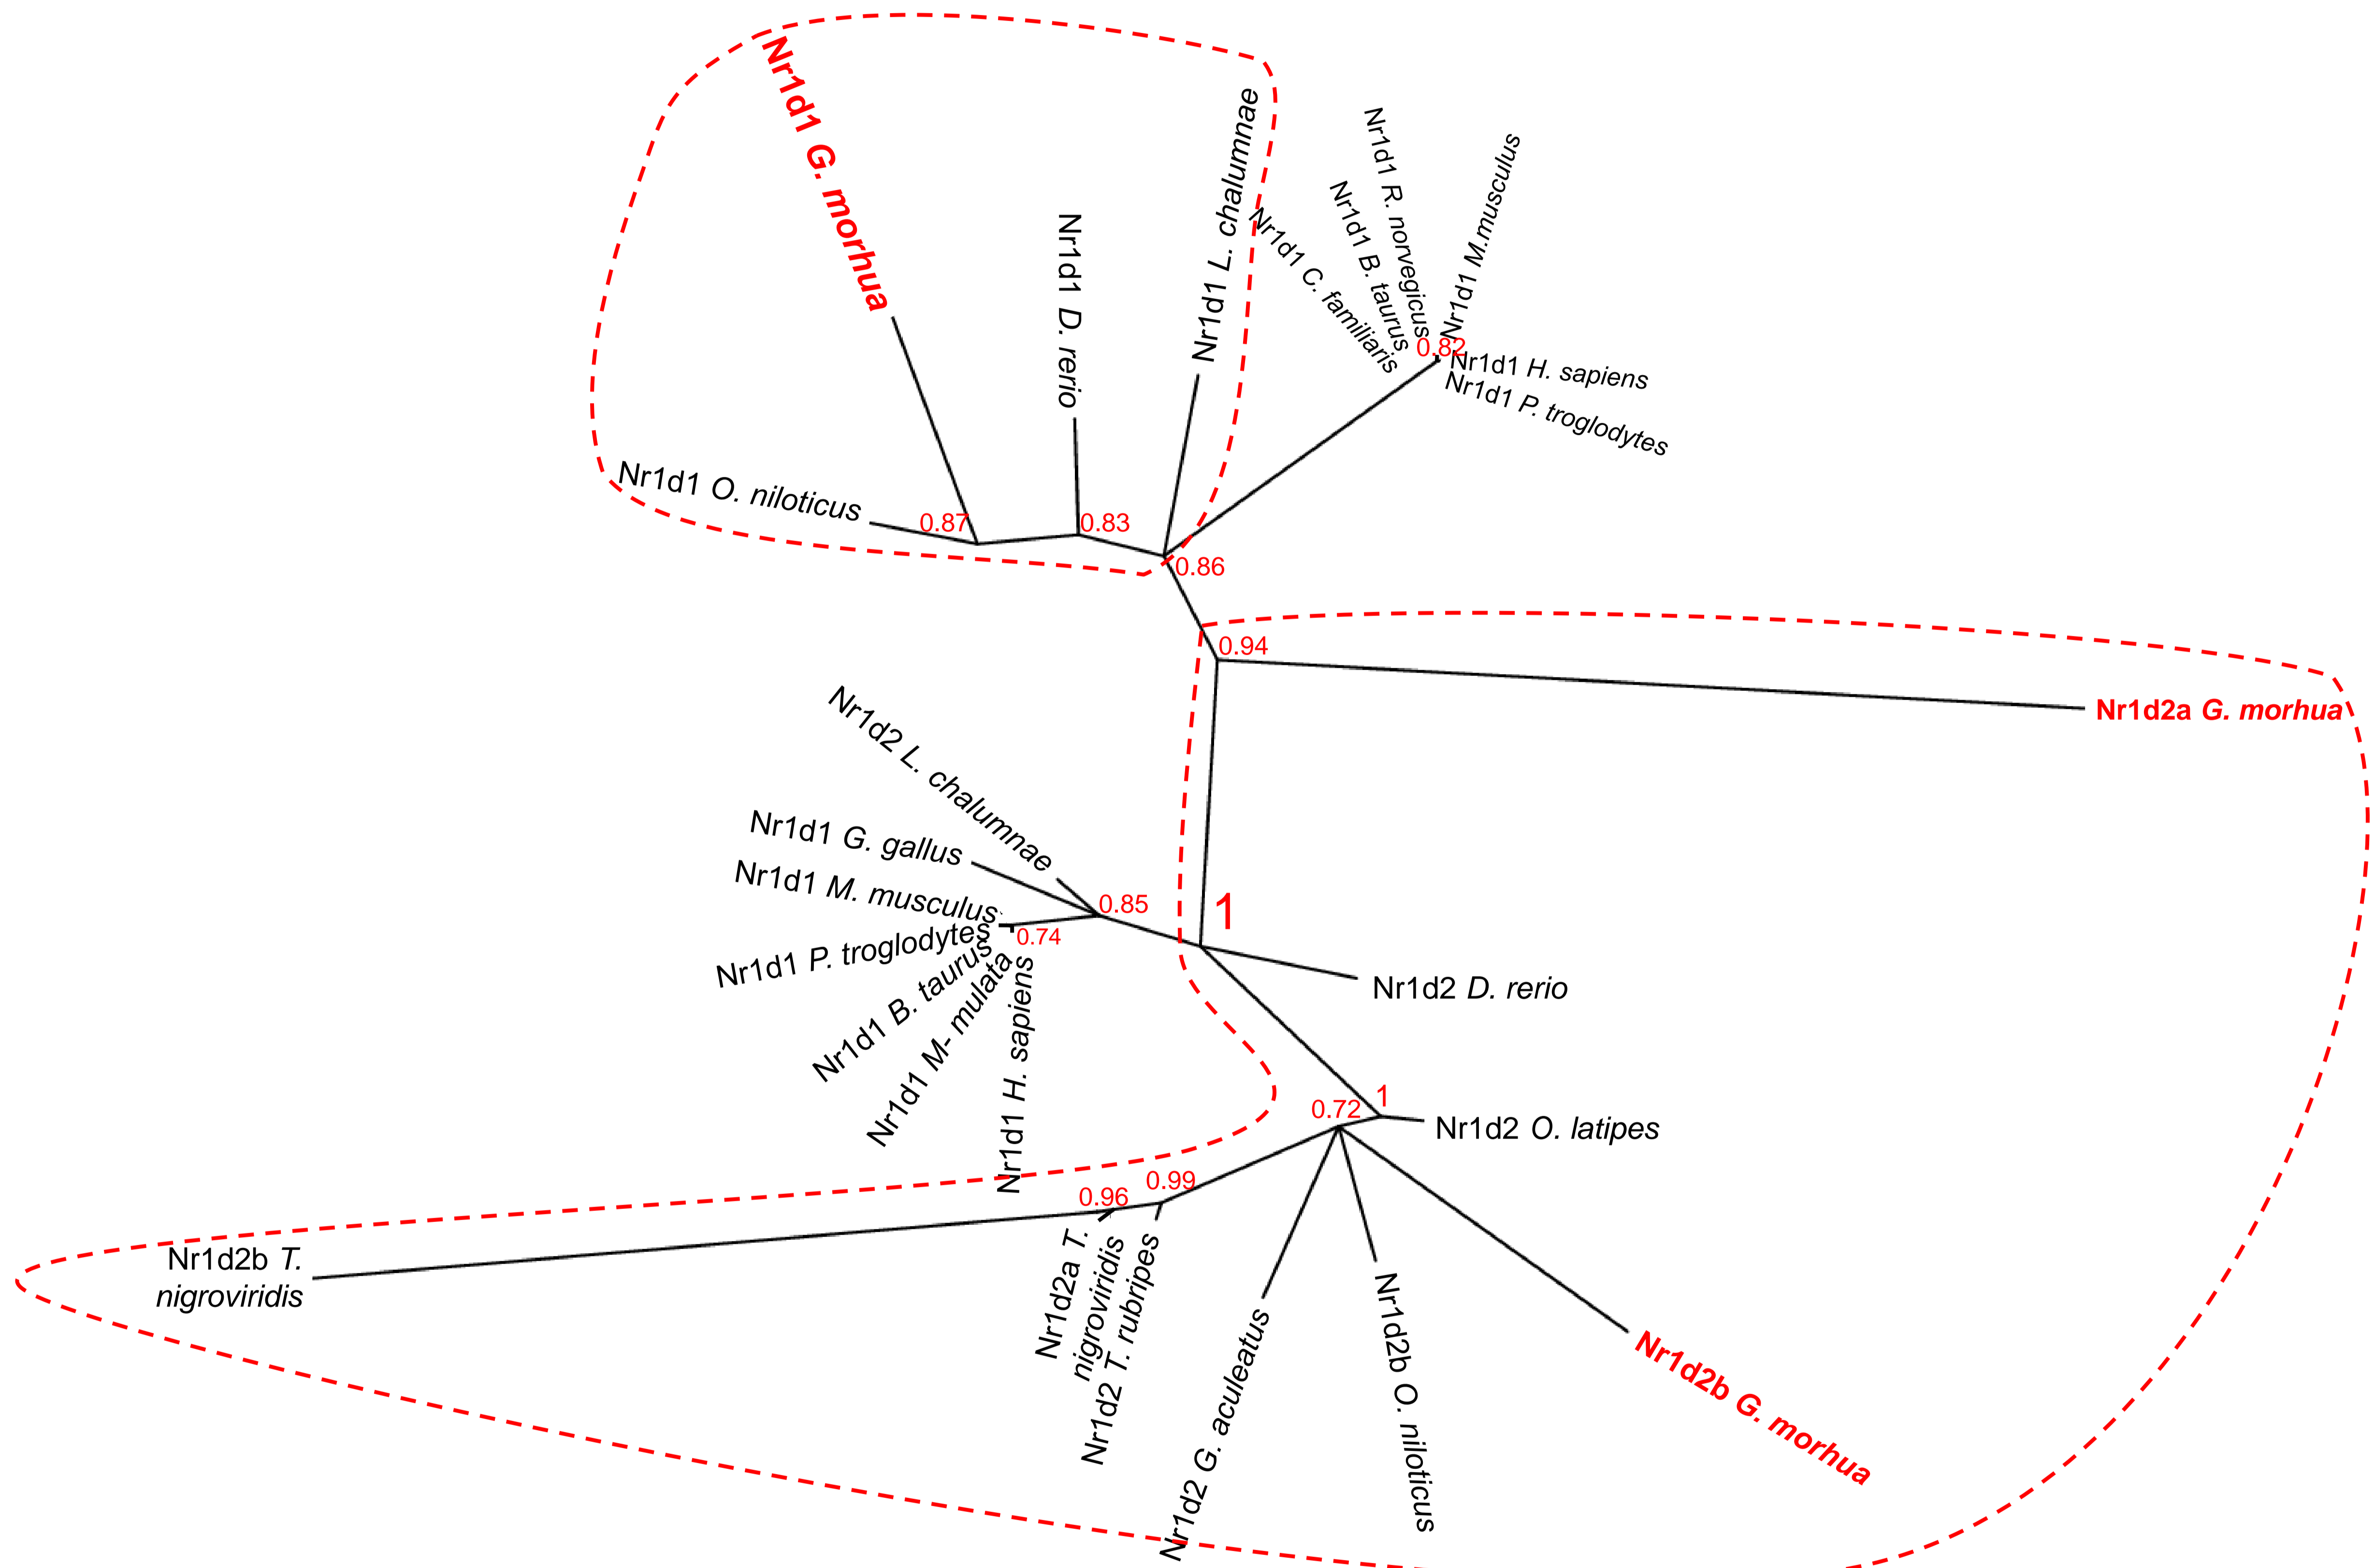

Figure S1

H. Rora

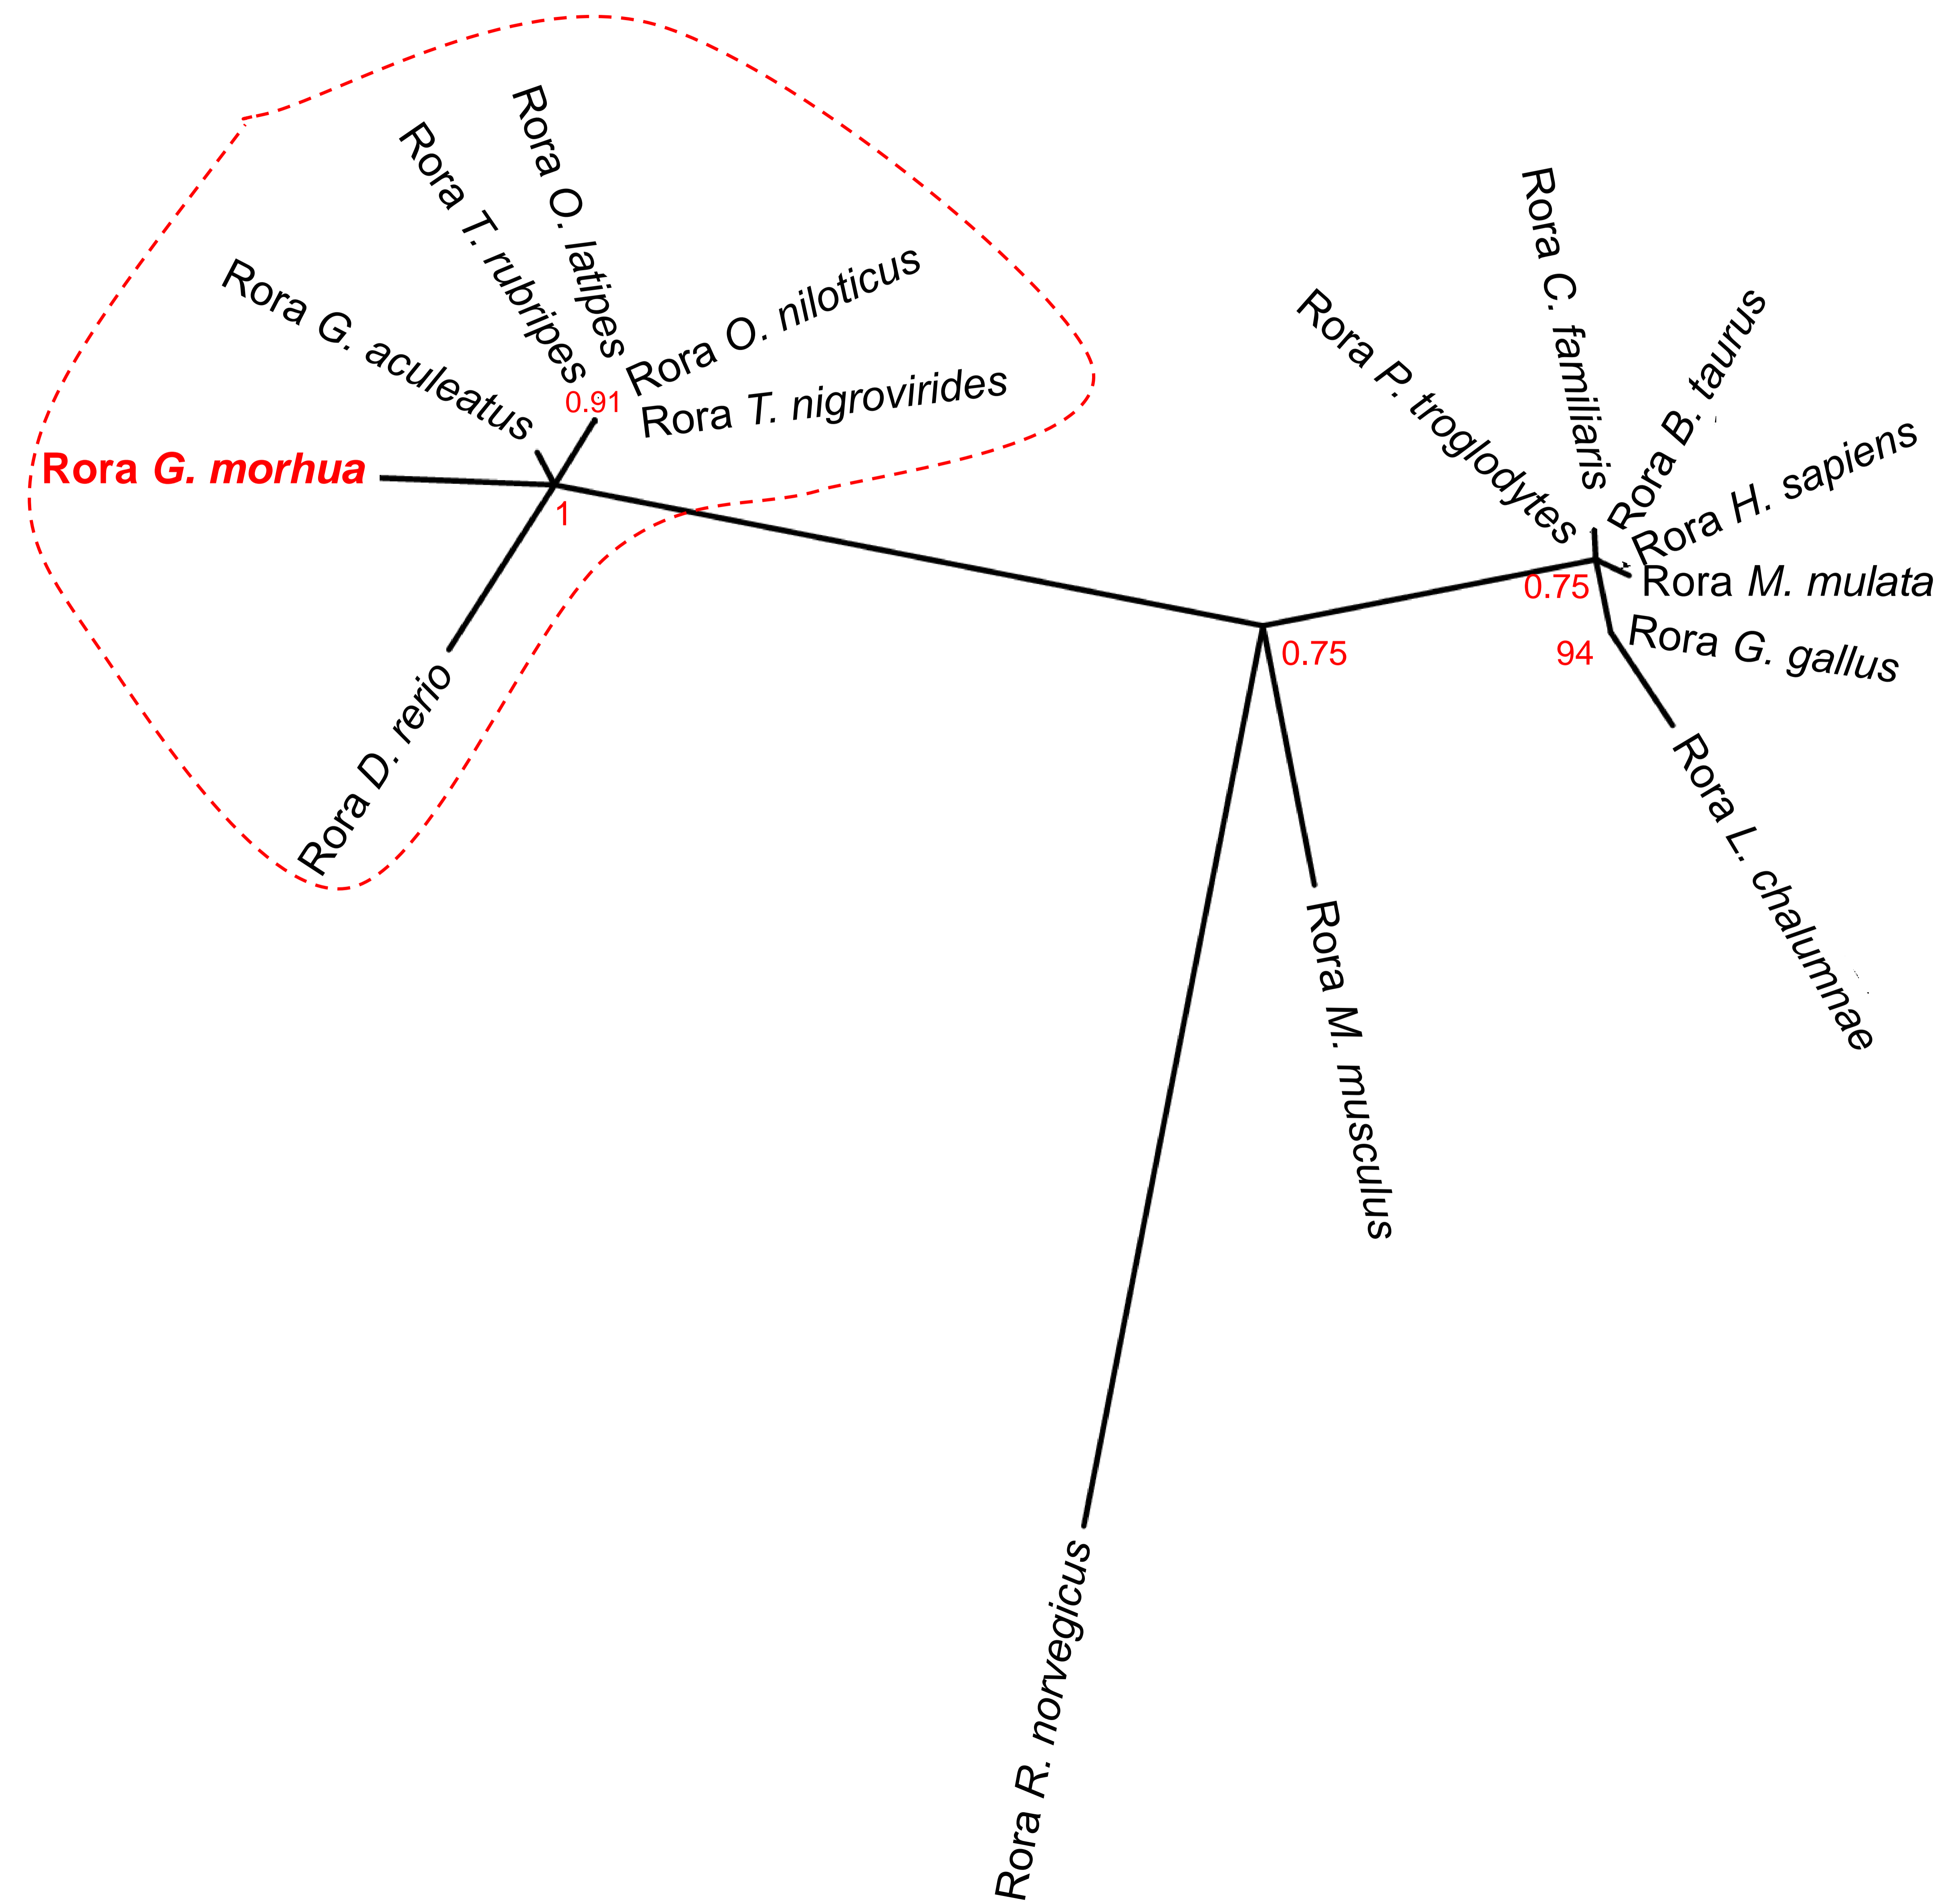

Supplement: pone.0099172.s001.pdf [file pone.0099172.s001.pdf]
