# Supplementary material for: Daily Rhythmicity of Clock Gene Transcripts in Atlantic Cod Fast Skeletal Muscle
Source: PubMed Central journal article supplement (PMC4062345; doi:10.1371/journal.pone.0099172), 2014-06-12
Supplement: pone.0099172.s003.pdf [file pone.0099172.s003.pdf]

**Table S1.** Gene name, GenBank accession number, genomic location, primer sequences and thermocycling parameters of the identified Atlantic cod clock genes.

| Gene name                 | GenBank Accession Number | Genomic location  | Primer sequences                                      | Annealing Temperature (°C) | E   | Amplicon size (bp) |
|---------------------------|--------------------------|-------------------|-------------------------------------------------------|----------------------------|-----|--------------------|
| <i><sup>1</sup>arntl1</i> | JN643704                 | GeneScaffold_2807 | F: AGGATGAAGTGCAACAGGCC<br>R: GATGGTGCAGAAGCTCTTGC    | 60                         | 97  | 99                 |
| <i><sup>1</sup>arntl2</i> | JX03864                  | GeneScaffold_1479 | F: TCTCAAAGGTTCTTCTTCTCGT<br>R: CACAAACAGAAAGCCATCGG  | 64                         | 85  | 103                |
| <i>clock</i>              | JN643707                 | GeneScaffold_3789 | F: CTGGAGCACCTACCGGCGGA<br>R: GCGGCGTGCCTCGACAGAGC    | 60                         | 87  | 101                |
| <i>npas1</i>              | KC204820                 | GeneScaffold_1829 | F: TACTGTGAGAACAGGATCTCGG<br>R: TGGCTCTGTCTCAGGTTGTC  | 66                         | na  | 113                |
| <i>npas2</i>              | JX035866                 | GeneScaffold_4285 | F: CAACAATGTGCCTACGTCCTC<br>R: GAACAGGAACCTTCCACTCCAG | 65                         | 104 | 199                |
| <i>cry1a</i>              | JN643708                 | GeneScaffold_3816 | F: AACTTCGACCGCATGCTGG<br>R: GGTGGTGGATCCAGCCCTC      | 60                         | 84  | 154                |
| <i>cry1b</i>              | KC204818                 | GeneScaffold_3870 | F: GACCTCGACAGGATCGTAGAG<br>R: CTGCACTTCCAGGTAGAGCT   | 66                         | 91  | 130                |
| <i>cry-dash</i>           | KC204819                 | GeneScaffold_827  | F: GCCAATCAGAGCACCTACAGG<br>R: CCACGGAACAGACTTGTCTGG  | 66                         | 115 | 126                |
| <i>cry2</i>               | JN643709                 | GeneScaffold_2629 | F: GGCTGGATCTGCCCCGACG<br>R: CCCAGCTCTTCCAGTGAGGG     | 60                         | 79  | 121                |
| <i>cry3</i>               | JX035865                 | GeneScaffold_2425 | F: CGTACAAGGCTCTCAGGTGG<br>R: CAGGGCAGATGCAGGTAAG     | 60                         | 95  | 176                |
| <i>per1</i>               | JN643710                 | GeneScaffold_3971 | F: TTCGGCAGCATCGACTCGTCGG<br>R: CCTCCATGTCCTGGAGGGC   | 60                         | 82  | 178                |
| <i>per2a</i>              | JN643711                 | GeneScaffold_1253 | F: GCTCCCATGATGTTCAACGCT<br>R: CCTCGATGATCTCAGATTCGG  | 64                         | 101 | 186                |
| <i>per2b</i>              | JX035863                 | GeneScaffold_4551 | F: CTGGGAGCGTCGTAGCCG<br>R: CGTATCAGCGGGGTAAG         | 63                         | 101 | 158                |
| <i>tim</i>                | JN634817                 | GeneScaffold_525  | F: CTGGGGTACCTGGAGGGG<br>R: CACCATGAGCCTTGATGCA       | 65                         | 104 | 213                |
| <i>rora</i>               | KC204821                 | GeneScaffold_2011 | F: GTGTCAGAACCGATCAGATAGTG<br>R: AGTCGTCACAGCCTAATGAC | 65                         | na  | 155                |
| <i><sup>2</sup>nr1d1</i>  | KC204822                 | GeneScaffold_3182 | F: GACTTCTCCCTCTCCTTCAG<br>R: CACCATTAGCACCTCAAAGG    | 60                         | 77  | 135                |
| <i><sup>3</sup>nr1d2a</i> | JN643712                 | GeneScaffold_1771 | F: CTGCAAGGGCTTCTTCCGTC<br>R: ATGTCCATGGTGGCGGACTC    | 63                         | 79  | 152                |
| <i>nr1d2b</i>             | KC204823                 | GeneScaffold_2532 | F: ACTTCTCCATGAGCTTTACTCC<br>R: AACCATTAGCACCTCGAAGG  | 64                         | 119 | 134                |

na = not used for qPCR analysis

<sup>1</sup>arntl1/2 is also known as brain and muscle Arnt-like 1/2, *bmal1/2*

<sup>2</sup>nr1d1 is also known as *rev-erb alpha*

<sup>3</sup>nr1d2 is also known as *rev-erb beta*
