# Supplementary material for: Daily Rhythmicity of Clock Gene Transcripts in Atlantic Cod Fast Skeletal Muscle
Source: PubMed Central journal article supplement (PMC4062345; doi:10.1371/journal.pone.0099172), 2014-06-12
Supplement: pone.0099172.s004.pdf [file pone.0099172.s004.pdf]

**Table S2.** List of primers for reference genes and muscle-related genes used in this study.

| Gene name    | GenBank Accession Number | Primer sequences                                          | Annealing Temperature (°C) | E   | Amplicon size (bp) | Reference             |
|--------------|--------------------------|-----------------------------------------------------------|----------------------------|-----|--------------------|-----------------------|
| <i>arp</i>   | EX741373                 | F: TGATCCTCCACGACGATGAG<br>R: CAGGGCCTTGCGAAGA            | 60                         | 98  | 113                | Olsvik et al..2008    |
| <i>eef1a</i> | EX721840                 | F: CACTGCGGTGAAGTCCGTTG<br>R: GGGGTCGTTCTTGCTGTCT         | 60                         | 93  | 79                 | Lilleeng et al.. 2007 |
| <i>ubi</i>   | EX735613                 | F: GGCCGCAAAGATGCAGAT<br>R: CTGGGCTCGACCTCAAGAGT          | 60                         | 98  | 69                 | Olsvik et al.. 2008   |
| <i>luc</i>   | M15077                   | F: TCATTCTTCGCCAAAAGCACTCTG<br>R: AGCCATATCCTTGTCGTATCCC  | 60                         | na  | 198                | Campos et al.. 2012   |
| <i>myoD</i>  | AF329903                 | F: GGCATGATGGATTTCAACGG<br>R: CTCGAGAGGCACTCCAGGCT        | 60                         | 89  | 128                | This study            |
| <i>myoG</i>  | JQ582407                 | F: AACTTCGACCGCATGCTGG<br>R: GGTGGTGGATCCAGCCCTC          | 60                         | 78  | 121                | Nagasawa et al.. 2012 |
| <i>myf5</i>  | JQ619514                 | F: GACCTCGACAGGATCGTAGAG<br>R: CTGCACTTCCAGGTAGAGCT       | 66                         | 78  | 140                | Nagasawa et al.. 2012 |
| <i>myf6</i>  | KC204827                 | F: GCAGCGCCATCAGCTACATC<br>R: GGTCTGCAGAGGCTGCAACTTC      | 66                         | 77  | 165                | This study            |
| <i>myhc</i>  | AY093703                 | F: CAGAAGCTATAAAAAGGTGTCCG<br>R: GCAGCCATTCTTCTTATCCTCCTC | 60                         | 79  | 86                 | Koedijk et al.. 2010  |
| <i>pcna</i>  | KC204826                 | F: CCTCAGCAGTATGTCAAAGATCC<br>R: GATGGTTTCAAACACAAGAACGAG | 60                         | 74  | 105                | This study            |
| <i>mstn</i>  | AF500271                 | F: GGCCACAGAGCCTGACCCCA<br>R: TCCGTCCGTAACGGGCGTCAG       | 60                         | 126 | 184                | This study            |
| <i>foxk2</i> | KC204825                 | F: CAACTCCTGTCCGTC AAGTC<br>R: CTTTGAGTCATCCTTGGGACTG     | 64                         | 75  | 148                | This study            |
| <i>mbnl</i>  | KC204824                 | F: AATATTGTGCATGGGACCTG<br>R: TATCGGAATCTGATTGGCTGAG      | 63                         | 90  | 126                | This study            |

na = not used for qPCR analysis

Olsvik PA, Søfteland L, Lie KK (2008) Selection of reference genes for qRT-PCR examination of wild populations of Atlantic cod *Gadus morhua*. BMC Research Notes 1.

Lilleeng E, Frøystad MK, Vekterud K, Valen EC, Krogdahl Å (2007) Comparison of intestinal gene expression in Atlantic cod (*Gadus morhua*) fed standard fish meal or soybean meal by means of suppression subtractive hybridization and real-time PCR. Aquaculture 267: 269-283.

Campos C, Valente LMP, Fernandes JMO (2012) Molecular evolution of zebrafish dnmt3 genes and thermal plasticity of their expression during embryonic development. Gene 500: 93-100.

Nagasawa K, Giannetto A, Fernandes JMO (2012) Photoperiod influences growth and MLL (mixed-lineage leukaemia) expression in Atlantic cod. PLoS ONE 7.

Koedijk RM, Le François NR, Blier PU, Foss A, Folkvord A, et al. (2010) Ontogenetic effects of diet during early development on growth performance, myosin mRNA expression and metabolic enzyme activity in Atlantic cod juveniles reared at different salinities. Comparative Biochemistry and Physiology - A Molecular and Integrative Physiology 156: 102-109.
