# Supplementary material for: Daily Rhythmicity of Clock Gene Transcripts in Atlantic Cod Fast Skeletal Muscle
Source: PubMed Central journal article supplement (PMC4062345; doi:10.1371/journal.pone.0099172), 2014-06-12
Supplement: pone.0099172.s005.pdf [file pone.0099172.s005.pdf]

**Table S3.** Parameters defining the daily rhythmic expression of muscle-related genes.

| <b>Gene name</b>    | <b>Period</b> | <b>Mesor</b> | <b>Amplitude</b> | <b>Acrophase (h)</b> | <b>P value</b> |
|---------------------|---------------|--------------|------------------|----------------------|----------------|
| <i>myoD</i>         | 24            | 0.21         | 0.068            | 3.58                 | 0.49           |
| <b><u>myf5</u></b>  | 24            | 0.35         | 0.089            | 7.49                 | 0.15           |
| <i>myh7c</i>        | 24            | 0.34         | 0.061            | 8.26                 | 0.60           |
| <i>myoG</i>         | 24            | 0.20         | 0.070            | 2.28                 | 0.46           |
| <i>pcna</i>         | 24            | 0.46         | 0.071            | 2.30                 | 0.45           |
| <i>myf6</i>         | 24            | 0.27         | 0.021            | 11.1                 | 0.96           |
| <i>mstn</i>         | 24            | 0.33         | 0.048            | 13.3                 | 0.52           |
| <b><u>mbnl1</u></b> | 24            | 0.54         | 0.271            | 7.20                 | 0.05           |
| <i>foxk2</i>        | 24            | 0.32         | 0.048            | 6.36                 | 0.69           |

NOTE: genes that are in bold font and underlined displayed daily rhythmicity in their expression.
