# Supplementary material for: Daily Rhythmicity of Clock Gene Transcripts in Atlantic Cod Fast Skeletal Muscle
Source: PubMed Central journal article supplement (PMC4062345; doi:10.1371/journal.pone.0099172), 2014-06-12
Supplement: pone.0099172.s006.pdf [file pone.0099172.s006.pdf]

**Table S4.** Correlation indices of clock and muscle-related gene expression.

| <b>Muscle-related genes</b> | <b>Clock genes</b> |               |              |              |              |              |                 |             |             |             |              |              |            |               |               |               |
|-----------------------------|--------------------|---------------|--------------|--------------|--------------|--------------|-----------------|-------------|-------------|-------------|--------------|--------------|------------|---------------|---------------|---------------|
|                             | <i>arntl1</i>      | <i>arntl2</i> | <i>clock</i> | <i>npas2</i> | <i>cry1a</i> | <i>cry1b</i> | <i>cry-dash</i> | <i>cry2</i> | <i>cry3</i> | <i>per1</i> | <i>per2a</i> | <i>per2b</i> | <i>tim</i> | <i>nr1d1a</i> | <i>nr1d2a</i> | <i>nr1d2b</i> |
| <i>myoD</i>                 | -0.65              | -0.21         | 0.05         | 0.00         | 0.29         | -0.12        | 0.45            | 0.52        | 0.02        | -0.14       | -0.39        | -0.32        | -0.02      | 0.60          | 0.06          | 0.04          |
| <i>myf5</i>                 | 0.09               | -0.10         | 0.84         | 0.45         | 0.45         | -0.13        | 0.26            | 0.17        | 0.11        | 0.42        | -0.47        | -0.27        | 0.16       | 0.77          | 0.64          | -0.27         |
| <i>myh7c</i>                | 0.36               | -0.05         | 0.57         | 0.34         | 0.45         | -0.16        | -0.28           | -0.22       | 0.23        | 0.14        | -0.47        | -0.14        | 0.04       | 0.28          | 0.39          | -0.36         |
| <i>myoG</i>                 | -0.59              | -0.15         | 0.27         | -0.01        | 0.35         | -0.04        | 0.40            | 0.45        | -0.12       | 0.06        | -0.43        | -0.51        | -0.12      | 0.69          | 0.21          | 0.11          |
| <i>pcna</i>                 | -0.47              | -0.51         | 0.29         | 0.49         | 0.06         | -0.36        | 0.54            | 0.57        | 0.37        | -0.09       | -0.54        | 0.01         | 0.56       | 0.81          | 0.38          | -0.37         |
| <i>myf6</i>                 | 0.21               | 0.44          | 0.48         | -0.30        | 0.53         | 0.62         | -0.10           | -0.11       | -0.65       | 0.77        | 0.19         | -0.82        | -0.55      | 0.35          | 0.12          | 0.66          |
| <i>mstn</i>                 | 0.15               | 0.36          | 0.39         | -0.25        | 0.47         | 0.57         | -0.18           | -0.05       | -0.55       | 0.68        | 0.11         | -0.75        | -0.64      | 0.23          | -0.03         | 0.62          |
| <i>mbnl1</i>                | 0.18               | -0.28         | 0.82         | 0.48         | 0.12         | -0.04        | -0.20           | -0.05       | 0.05        | 0.50        | -0.54        | -0.38        | 0.14       | 0.52          | 0.55          | -0.18         |
| <i>foxk2</i>                | -0.33              | 0.11          | 0.51         | -0.06        | 0.50         | 0.09         | 0.46            | 0.32        | -0.30       | 0.34        | -0.24        | -0.59        | -0.20      | 0.74          | 0.40          | 0.19          |
